# Supplementary material
Source: PubMed Central journal article supplement (PMC9464592)
Supplement: NIHMS1819673-supplement-1819673_Sup_Info.pdf [file NIHMS1819673-supplement-1819673_Sup_Info.pdf]

# Structure of the nutrient-sensing hub GATOR2

Max L. Valenstein<sup>1,2,8,\*</sup>, Kacper B. Rogala<sup>1,3,5,6,7,8,\*</sup>, Pranav V. Lalgudi<sup>1,2</sup>, Edward J. Brignole<sup>2,4</sup>, Xin Gu<sup>1,2</sup>, Robert A. Saxton<sup>1,2</sup>, Lynne Chantranupong<sup>1,2</sup>, Jonas Kolibius<sup>1</sup>, Jan-Philipp Quast<sup>1</sup>, David M. Sabatini

<sup>1</sup>Whitehead Institute for Biomedical Research, Cambridge, MA, USA.

<sup>2</sup>Department of Biology, Massachusetts Institute of Technology, Cambridge, MA, USA.

<sup>3</sup>Broad Institute of Harvard and Massachusetts Institute of Technology, Cambridge, MA, USA.

<sup>4</sup>MIT.nano, Massachusetts Institute of Technology, Cambridge, MA, USA.

<sup>5</sup>Stanford Cancer Institute, Stanford University School of Medicine, Stanford, CA, USA.

<sup>6</sup>Department of Structural Biology, Stanford University School of Medicine, Stanford, CA, USA.

<sup>7</sup>Department of Chemical and Systems Biology, Stanford University School of Medicine, Stanford, CA, USA.

<sup>8</sup>These authors contributed equally to this work.

\*Correspondence: mvalenst@wi.mit.edu, rogala@stanford.edu

## TABLE OF CONTENTS

| <b>Supplementary Figures</b>                                                                        | <b>Page</b> |
|-----------------------------------------------------------------------------------------------------|-------------|
| Supplementary Figure 1. Gel source images.                                                          | 2           |
| Supplementary Figure 2. Cryo-EM data collection and processing workflow.                            | 30          |
| Supplementary Figure 3. Structural determination of GATOR2.                                         | 31          |
| Supplementary Figure 4. Generation of a composite GATOR2 map.                                       | 32          |
| Supplementary Figure 5. Sequence alignment of MIOS.                                                 | 33          |
| Supplementary Figure 6. Sequence alignment of WDR24.                                                | 34          |
| Supplementary Figure 7. Sequence alignment of WDR59.                                                | 35          |
| Supplementary Figure 8. Sequence alignment of SEH1L.                                                | 36          |
| Supplementary Figure 9. Sequence alignment of SEC13.                                                | 37          |
| <b>Supplementary Tables</b>                                                                         |             |
| Supplementary Table 1. Summary of cryo-EM data collection, 3D reconstruction, and model refinement. | 38          |

# Supplementary Figure 1 | part 1

Fig. 1b - Coomassie Stain

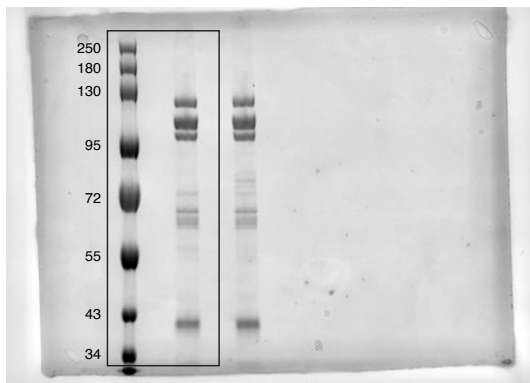

Fig. 2d - HA (IP)

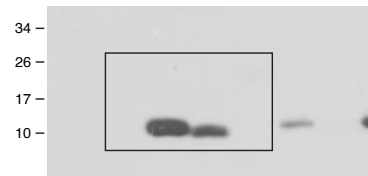

Fig. 1e - S6K pT389

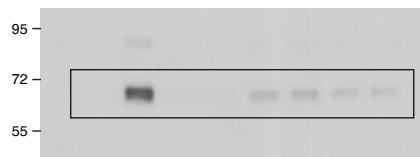

Fig. 2d - FLAG-METAP2 (IP)

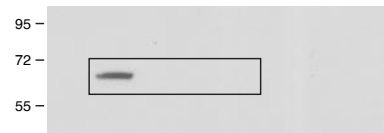

Fig. 1e - S6K

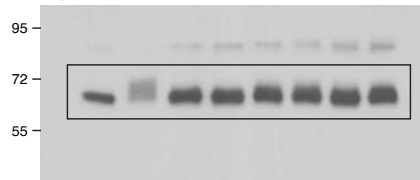

Fig. 2d - FLAG-MIOS-CTD (IP)

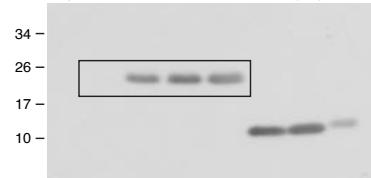

Fig. 1e - WDR24

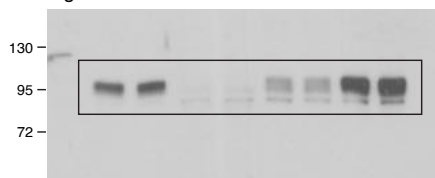

Fig. 2d - HA (cell lysate)

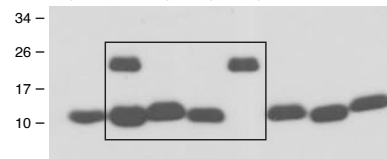

Fig. 1e - MIOS

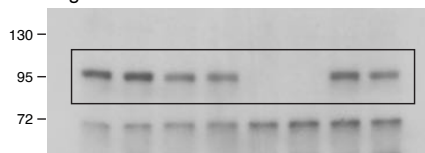

Fig. 2d - FLAG-METAP2 (cell lysate)

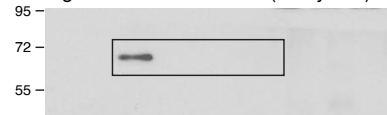

Fig. 1e - WDR59

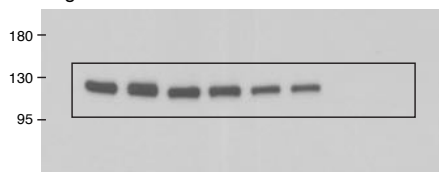

Fig. 2d - FLAG-MIOS-CTD (cell lysate)

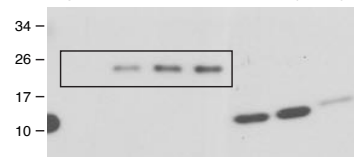

Fig. 1e - Raptor

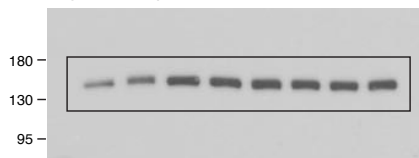

## Supplementary Figure 1 | part 2

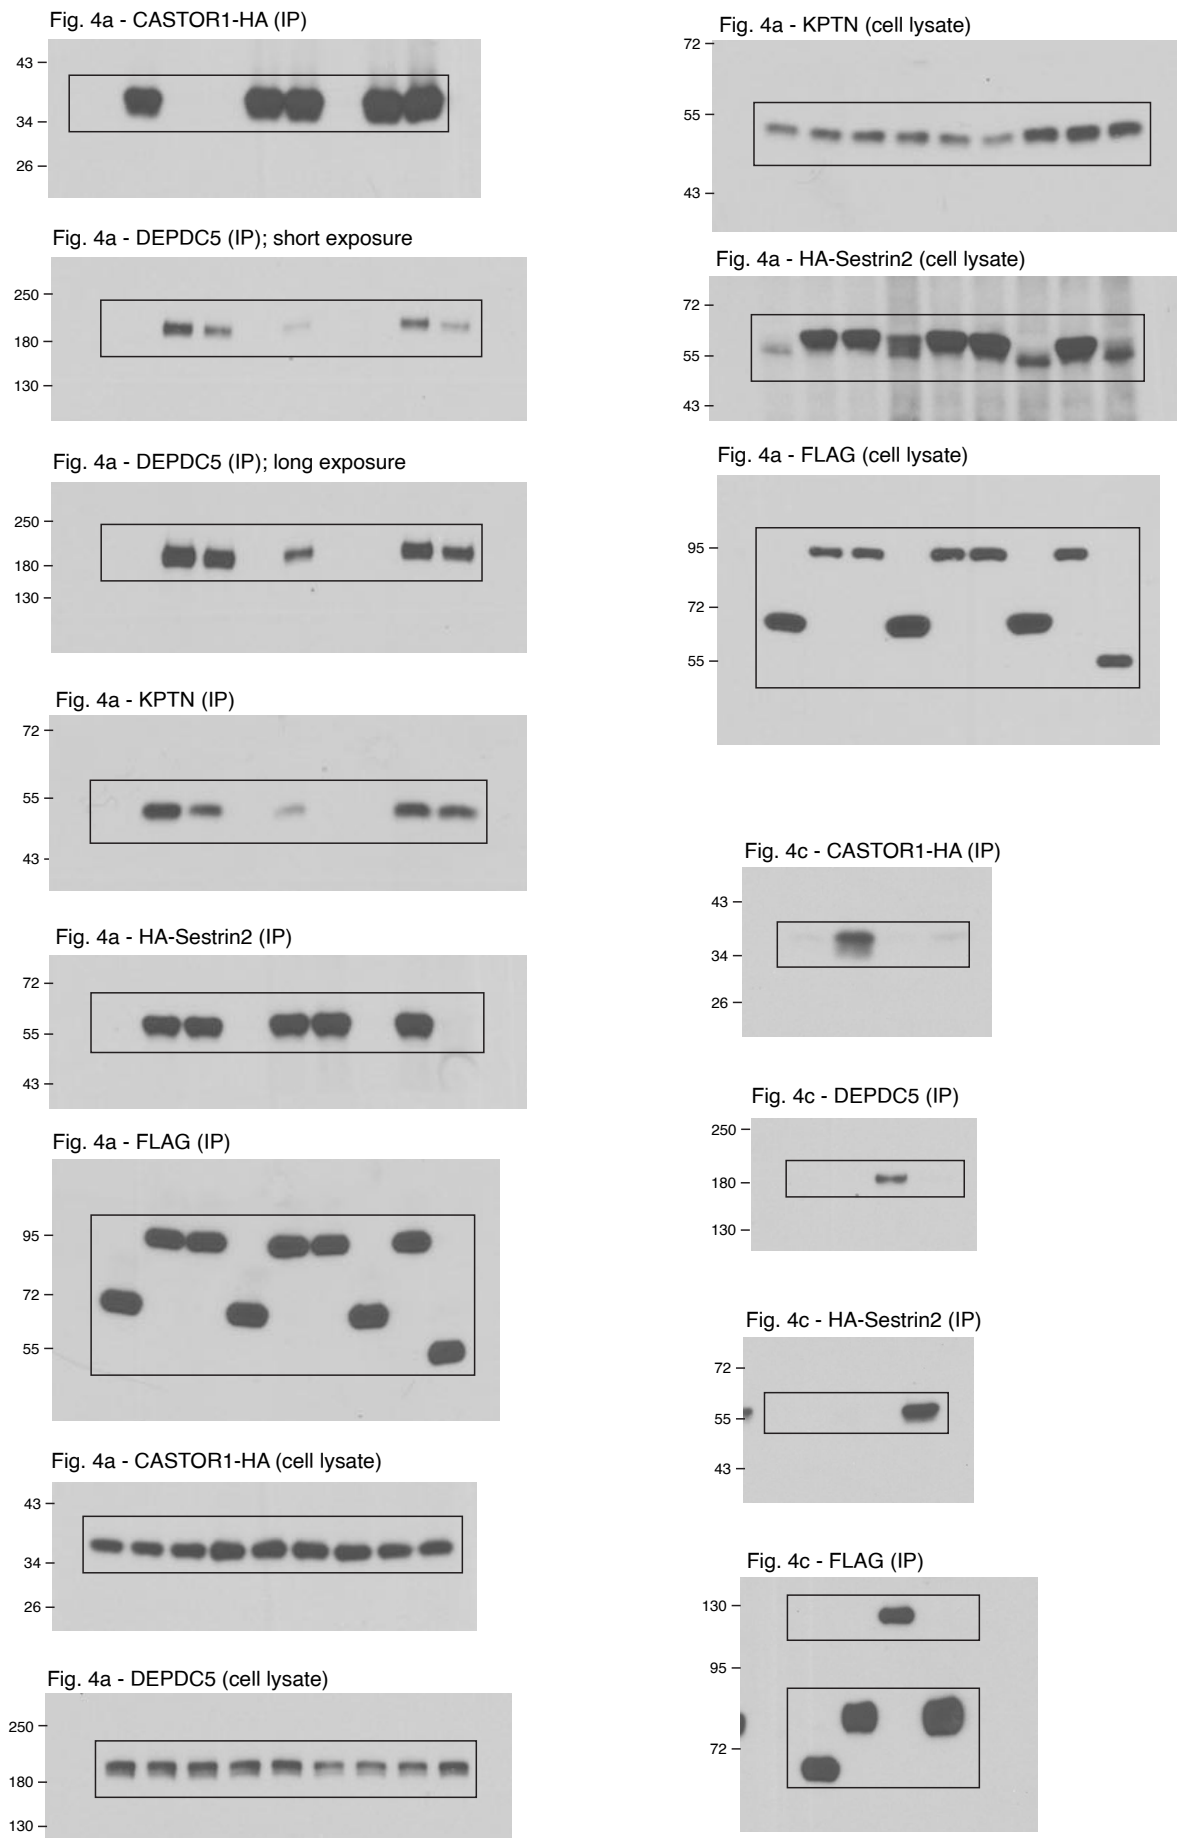

# Supplementary Figure 1 | part 3

Fig. 4c - CASTOR1-HA (cell lysate)

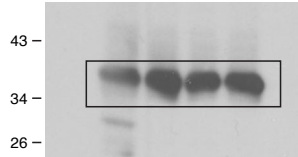

Fig. 4c - DEPDC5 (cell lysate)

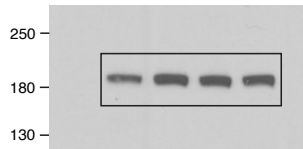

Fig. 4c - HA-Sestrin2 (cell lysate)

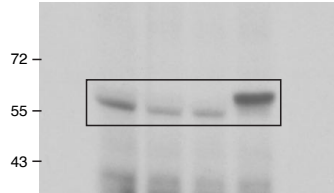

Fig. 4c - FLAG (cell lysate)

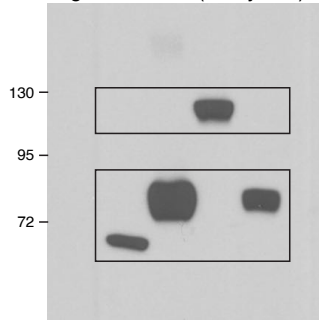

Fig. 4d - FLAG (cell lysate)

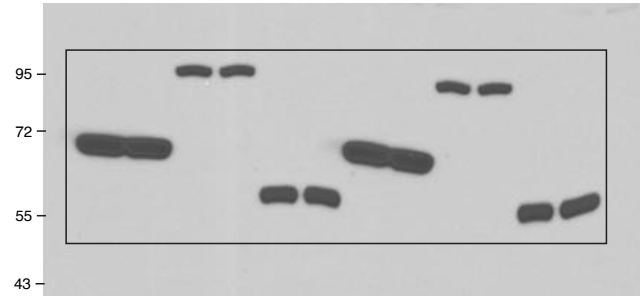

Fig. 4d - Raptor (cell lysate)

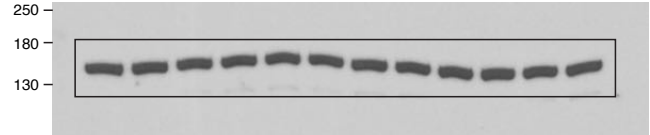

Fig. 4e - S6K pT389 (HA IP)

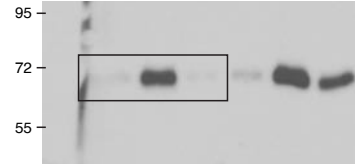

Fig. 4e - S6K (HA IP)

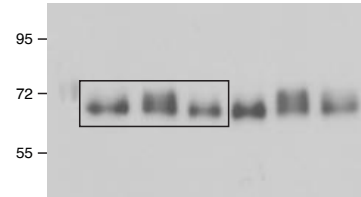

Fig. 4d - S6K pT389 (IP)

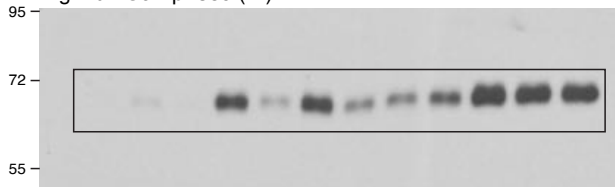

Fig. 4d - S6K (IP)

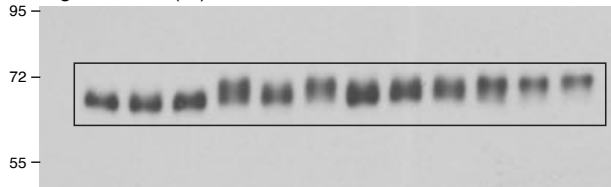

Fig. 4d - CASTOR1-myc (cell lysate)

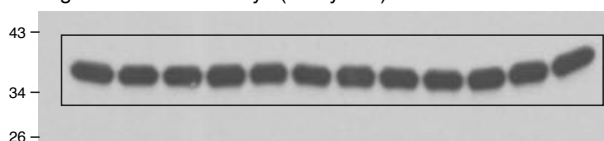

Fig. 4e - DEPDC5 (FLAG IP)

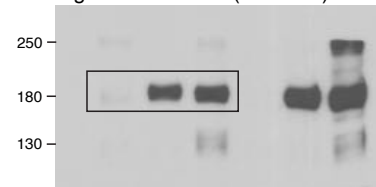

Fig. 4e - KPTN (FLAG IP)

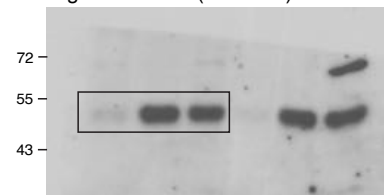



Fig. 4e - FLAG (FLAG IP)

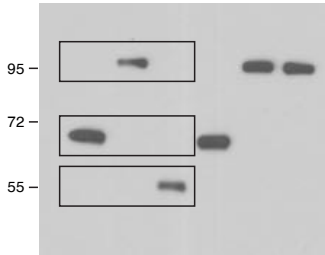

Fig. 4e - DEPDC5 (cell lysate)

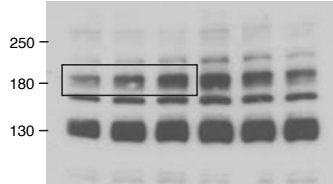

Fig. 4e - KPTN (cell lysate)

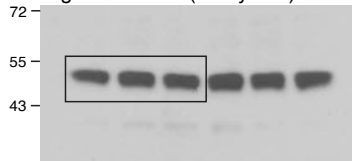

Fig. 4e - FLAG (cell lysate)

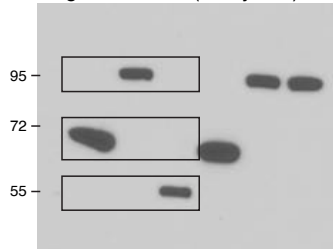

Ext. Data Fig. 1a - Coomassie (top)

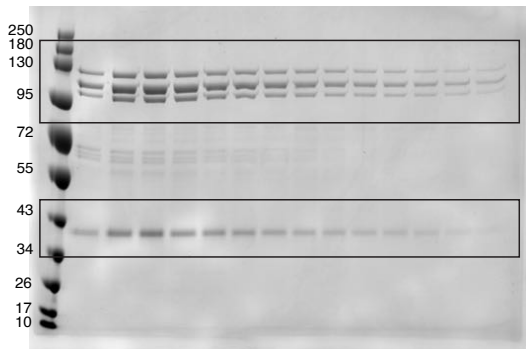

Ext. Data Fig. 1a - SYPRO Ruby (-AAs, middle)

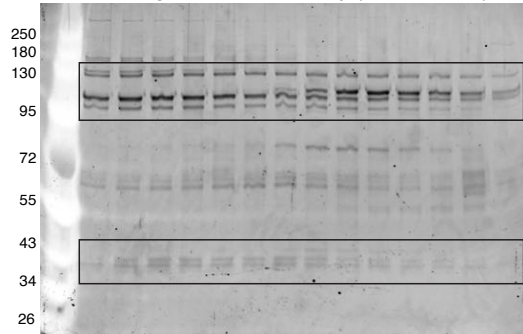

Ext. Data Fig. 1a - SYPRO Ruby (+AAs, bottom)

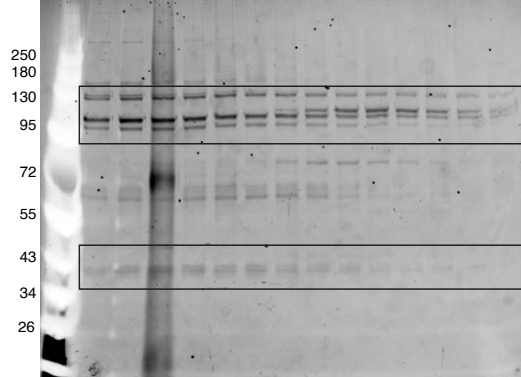

Ext. Data Fig. 1b - 3xFLAG

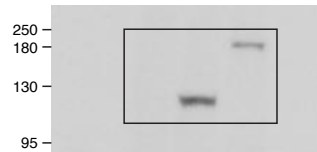

Ext. Data Fig. 1b - KPTN

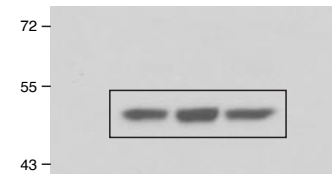

Ext. Data Fig. 1c - S6K pT389

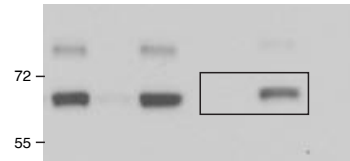

Ext. Data Fig. 1c - S6K

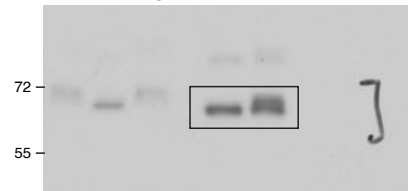

Ext. Data Fig. 1c - Raptor

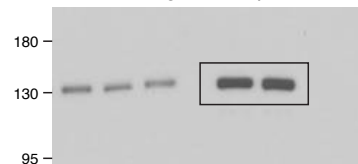

Ext. Data Fig. 1d - SYPRO Ruby

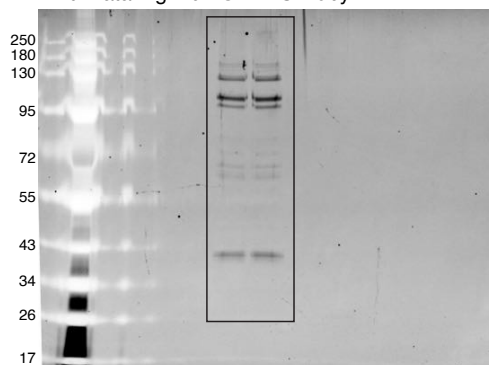

# Supplementary Figure 1 | part 5

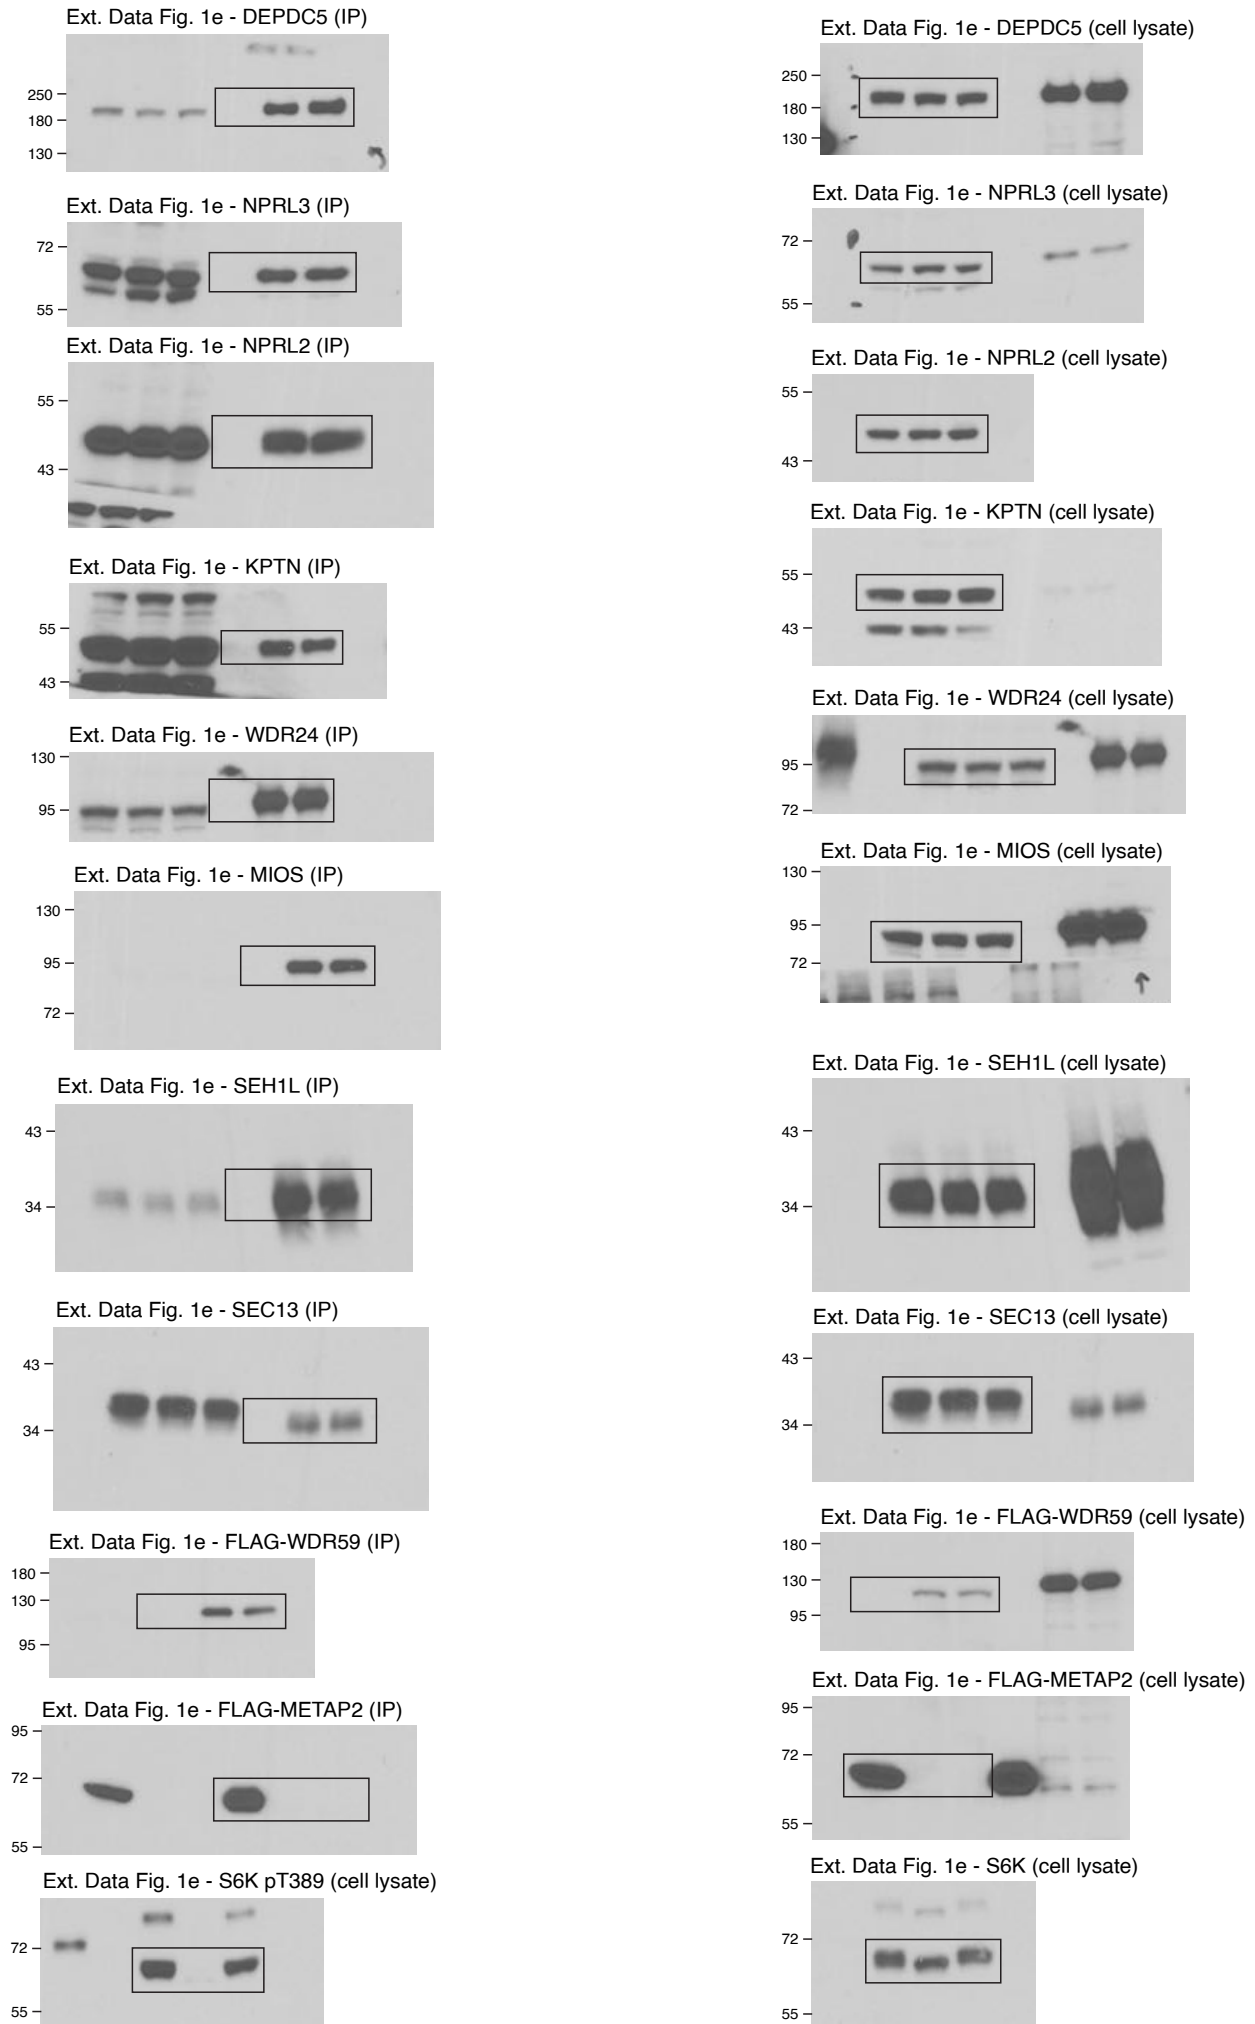

# Supplementary Figure 1 | part 6

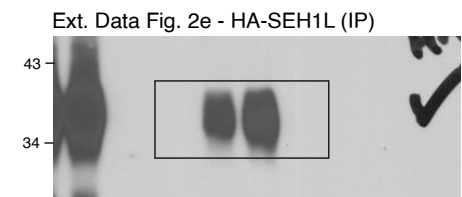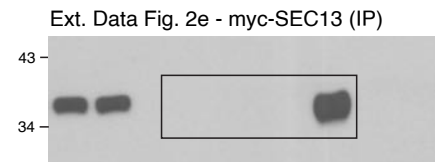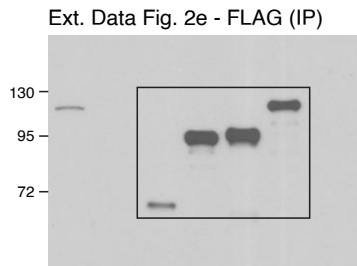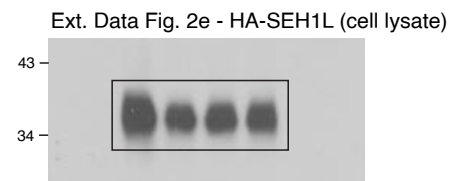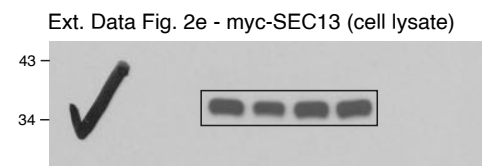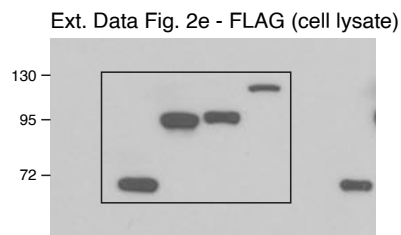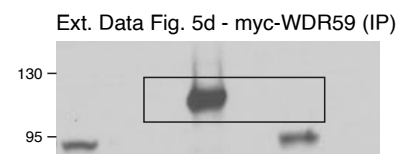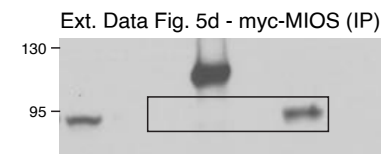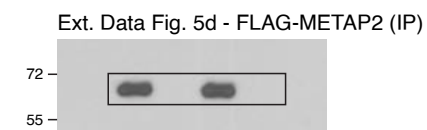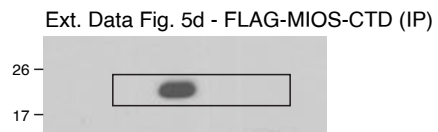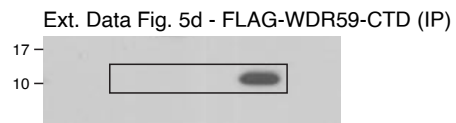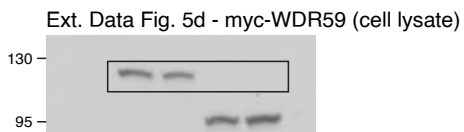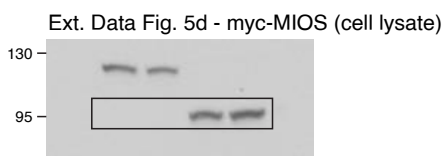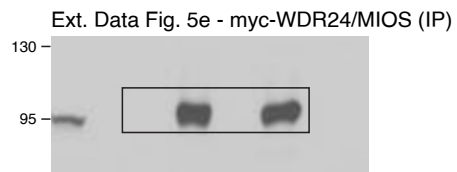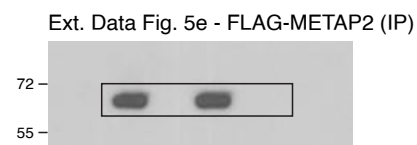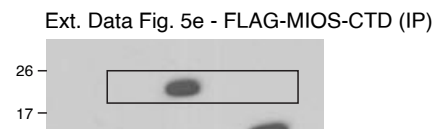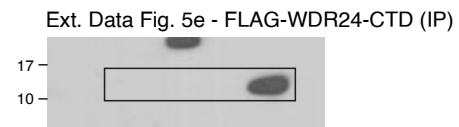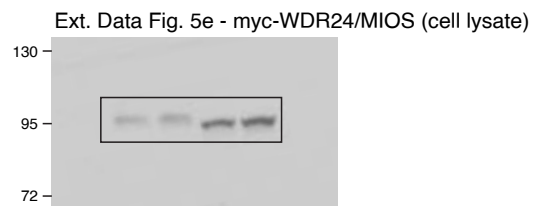

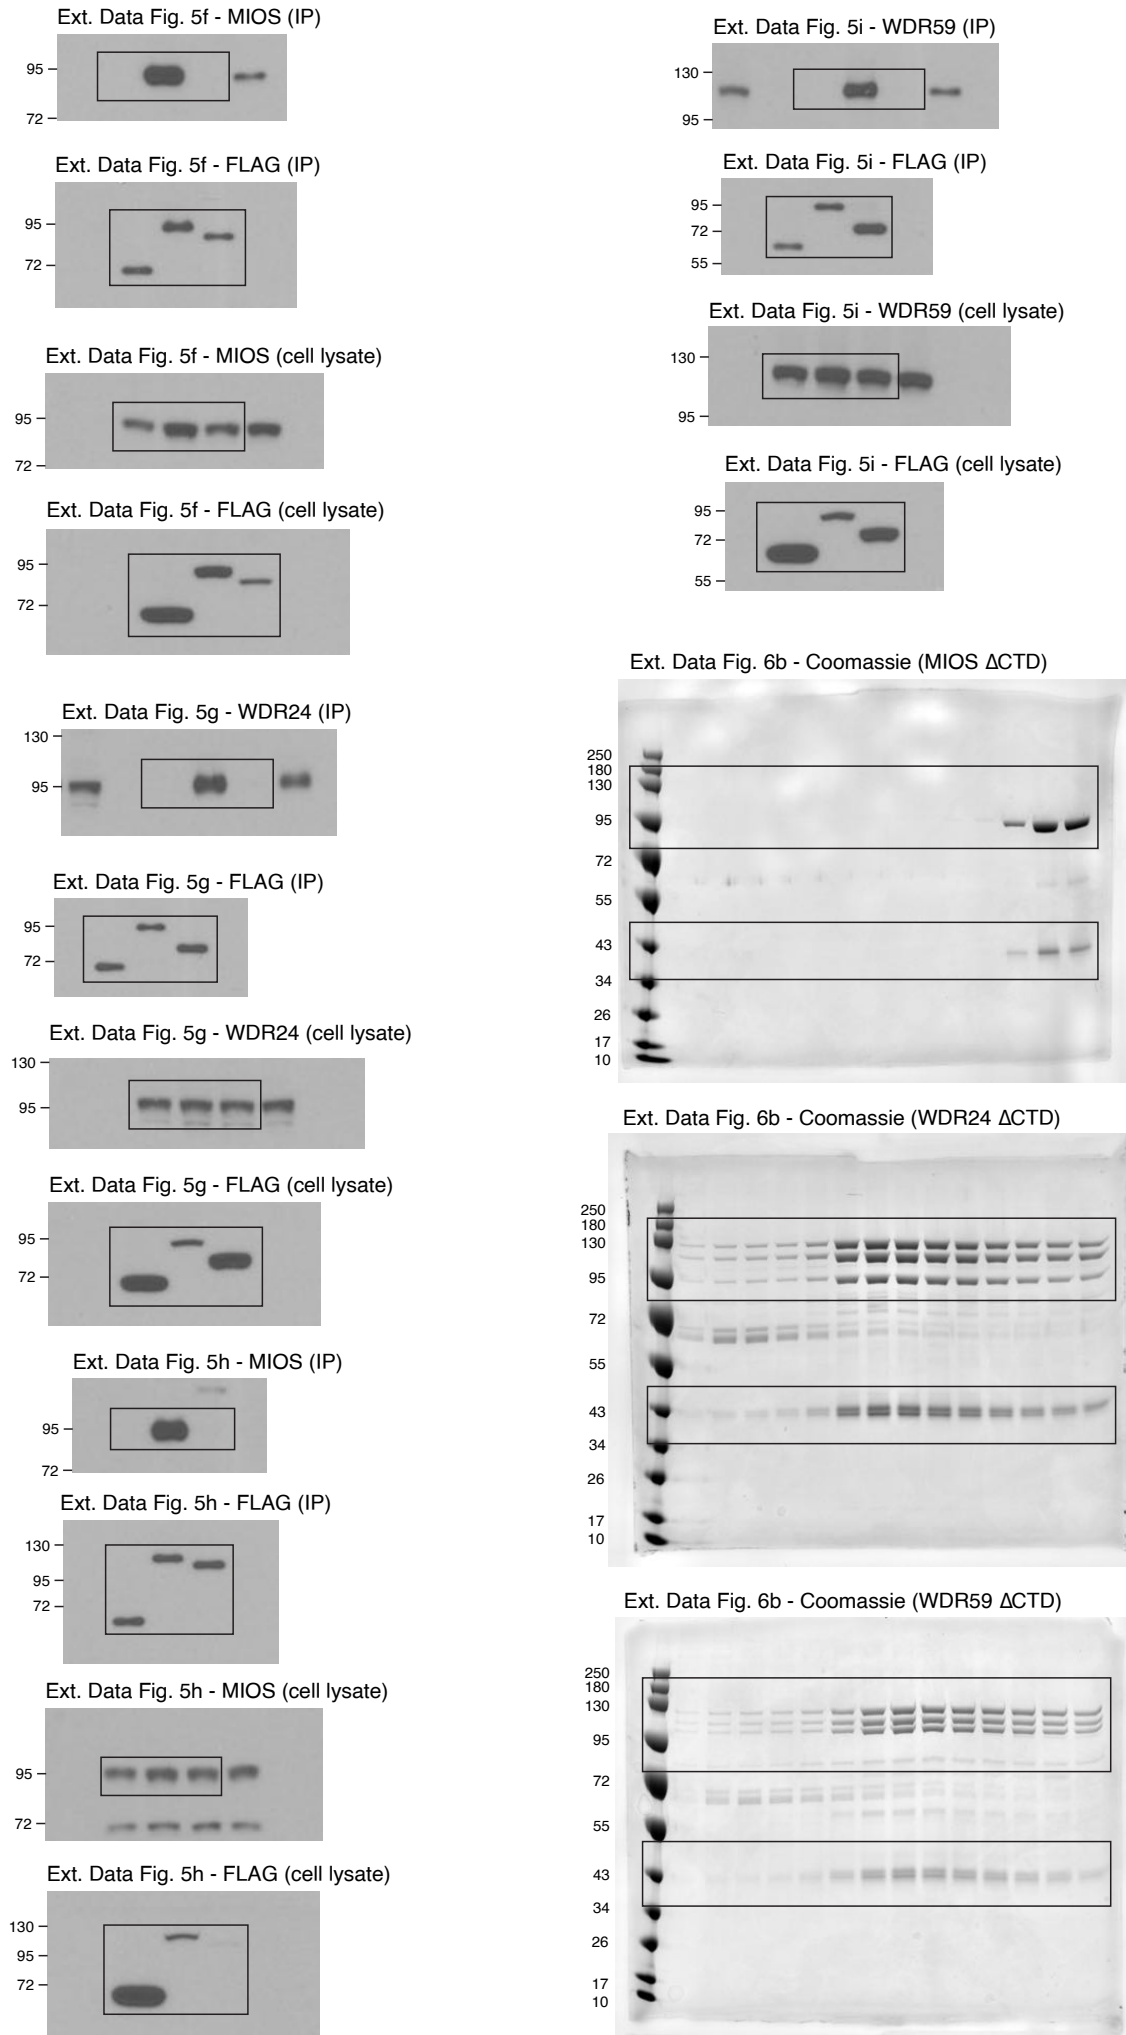

# Supplementary Figure 1 | part 8

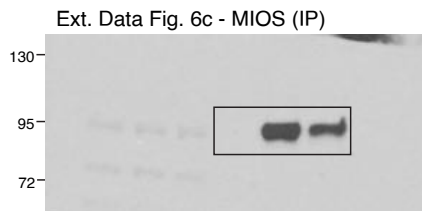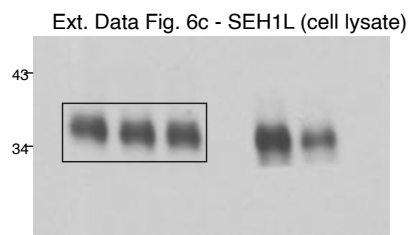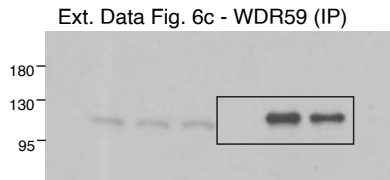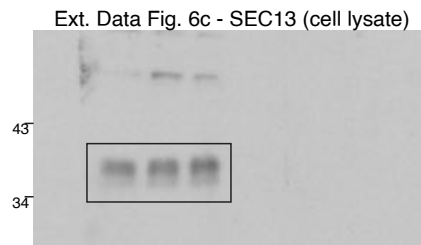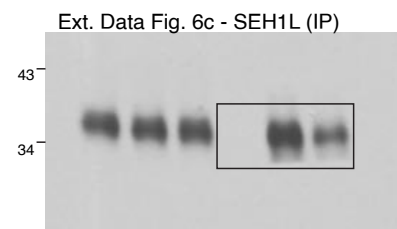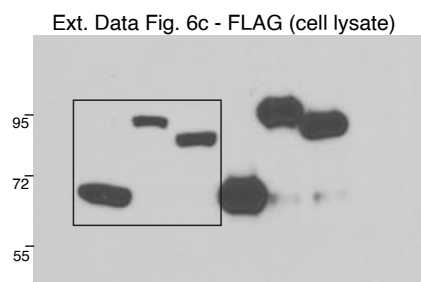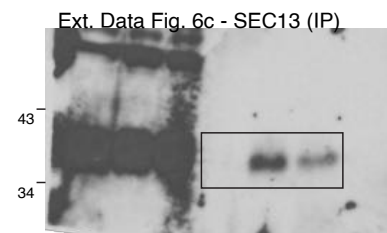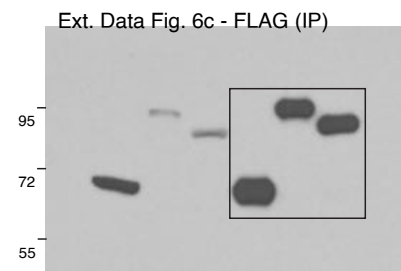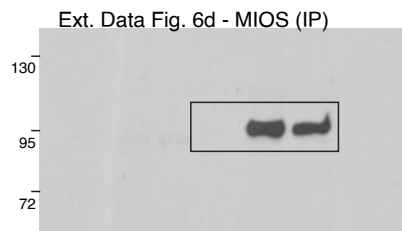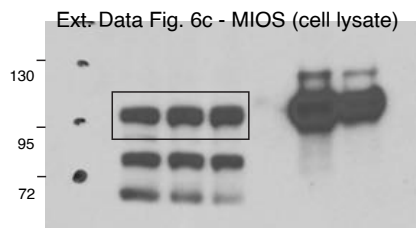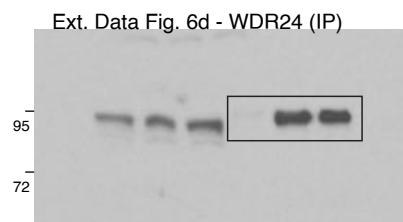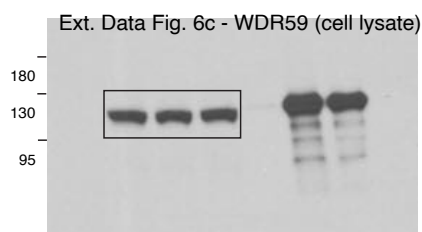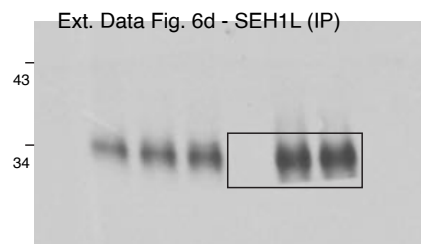

Ext. Data Fig. 6d - SEC13 (IP)

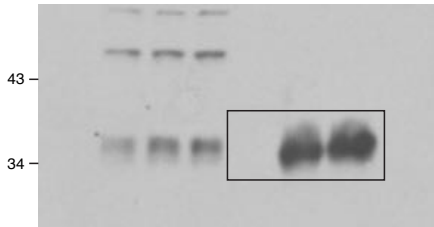

Ext. Data Fig. 6d - FLAG (cell lysate)

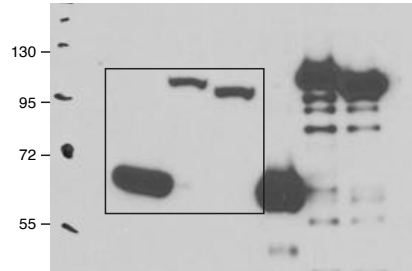

Ext. Data Fig. 6d - FLAG (IP)

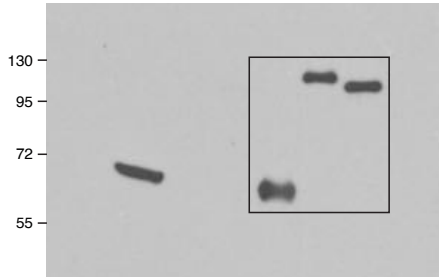

Ext. Data Fig. 6e - WDR24 (IP)

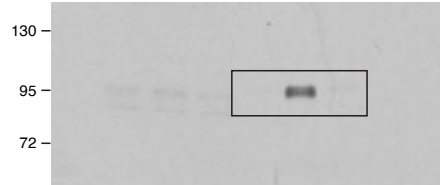

Ext. Data Fig. 6d - MIOS (cell lysate)

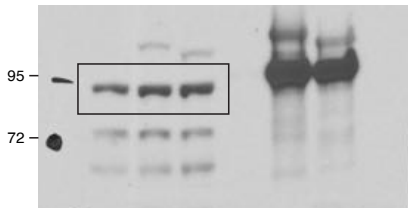

Ext. Data Fig. 6e - WDR59 (IP)

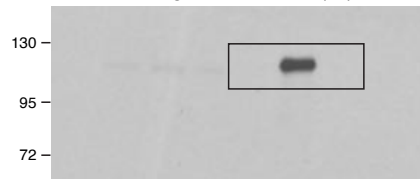

Ext. Data Fig. 6d - WDR24 (cell lysate)

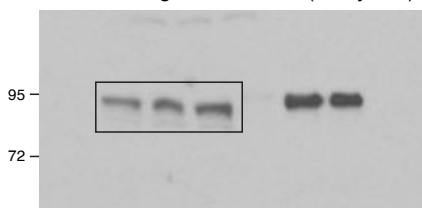

Ext. Data Fig. 6e - SEH1L (IP)

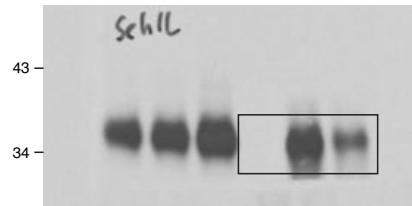

Ext. Data Fig. 6d - SEH1L (cell lysate)

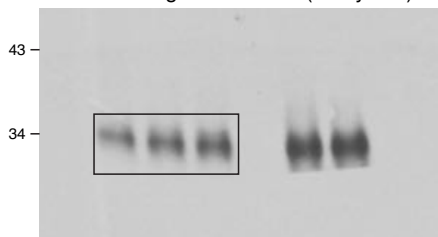

Ext. Data Fig. 6e - SEC13 (IP)

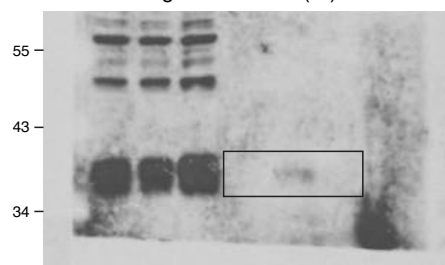

Ext. Data Fig. 6d - SEC13 (IP)

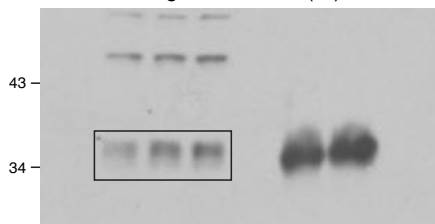

Ext. Data Fig. 6e - FLAG (IP)

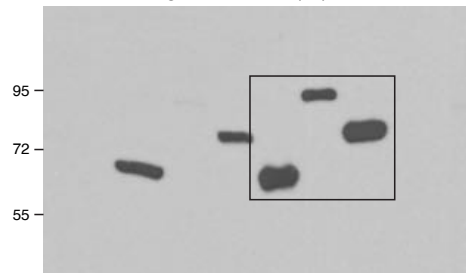

# Supplementary Figure 1 | part 10

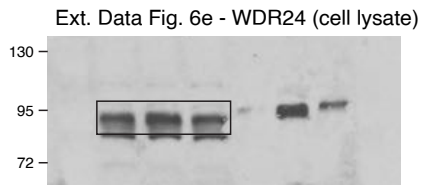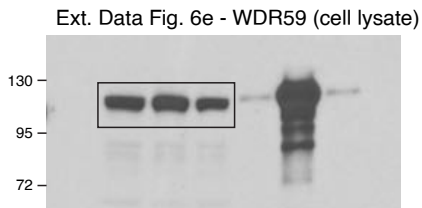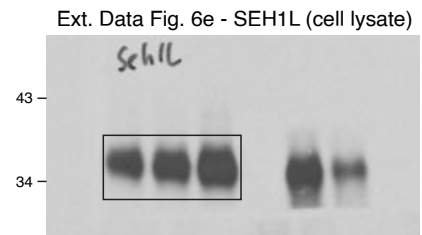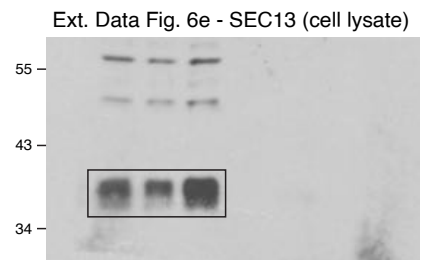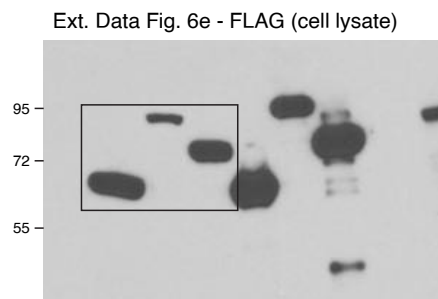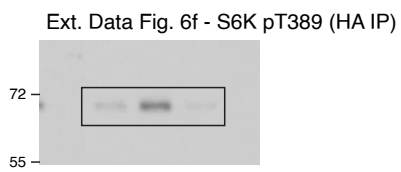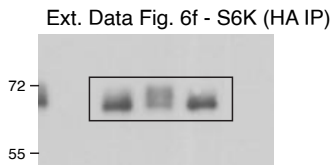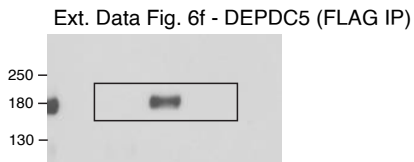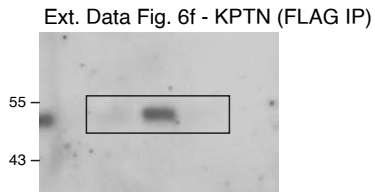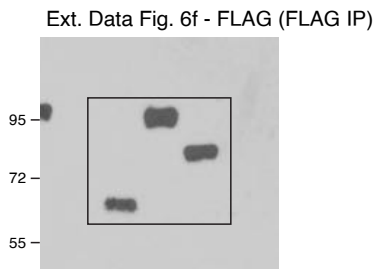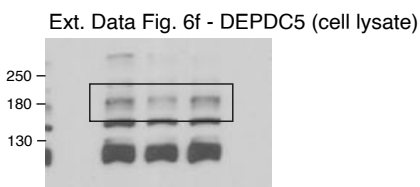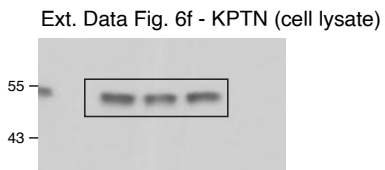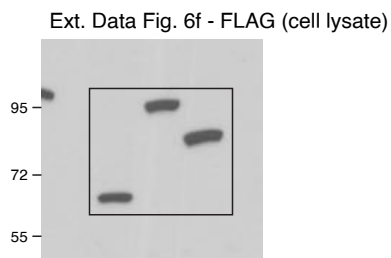

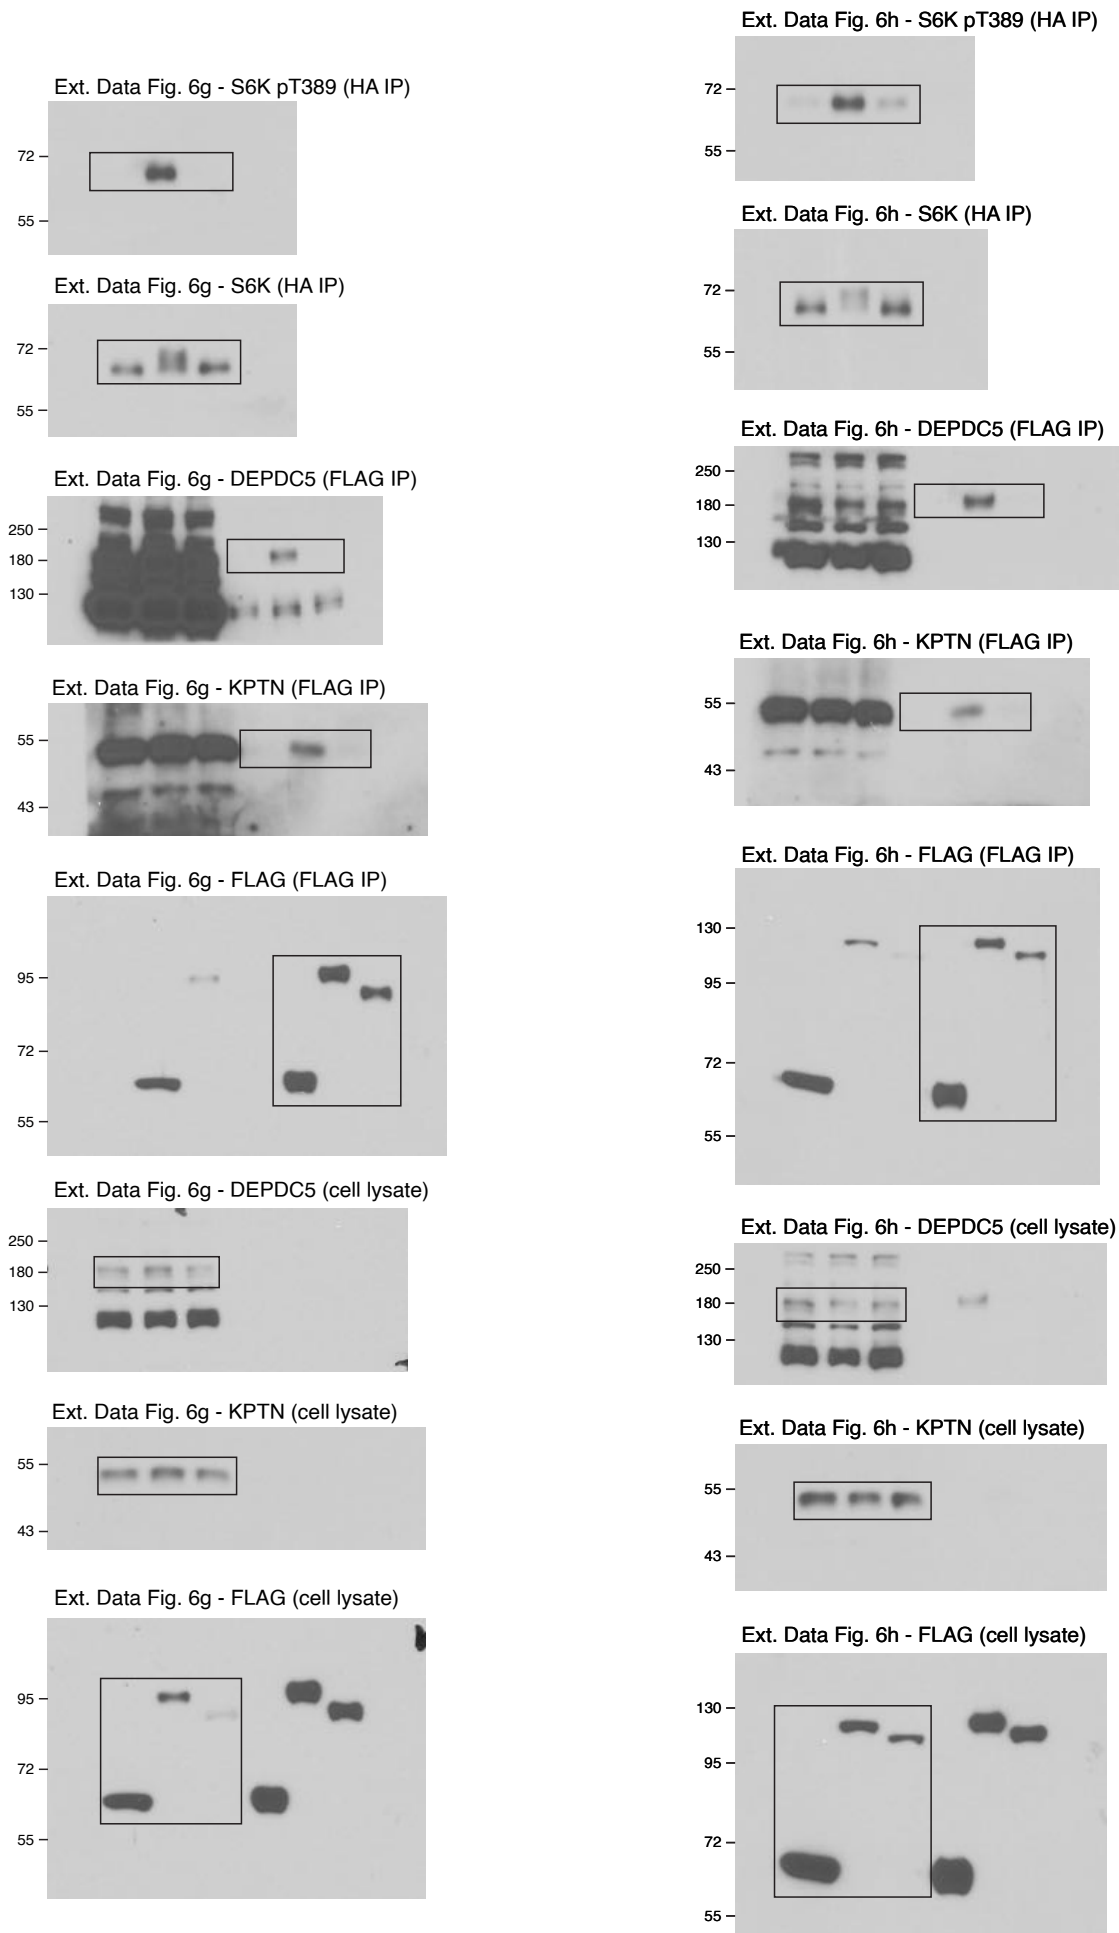



# Supplementary Figure 1 | part 12

Ext. Data Fig. 8a - DEPDC5 (left)

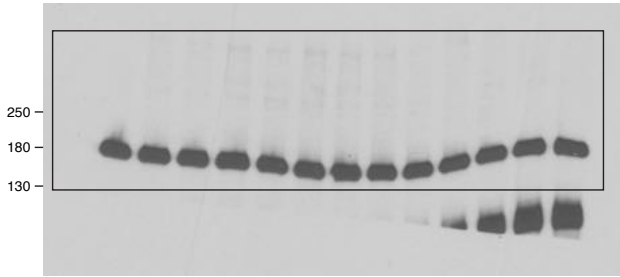

Ext. Data Fig. 8a - DEPDC5 (right)

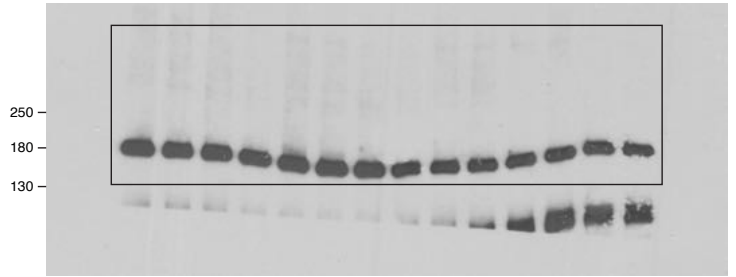

Ext. Data Fig. 8a - NPRL3 (left)

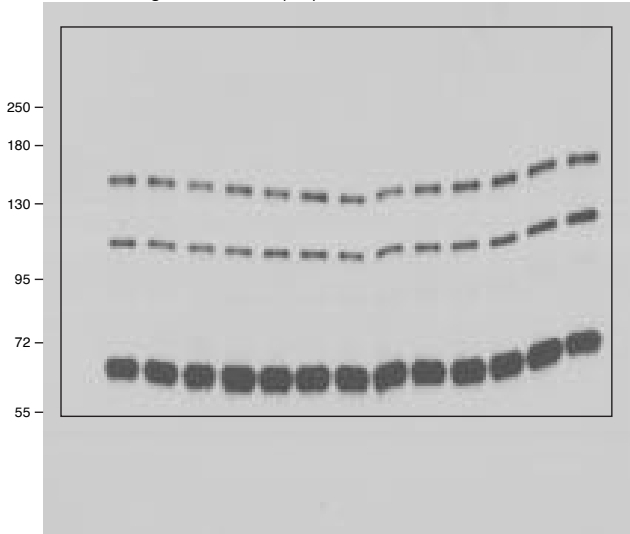

Ext. Data Fig. 8a - NPRL3 (right)

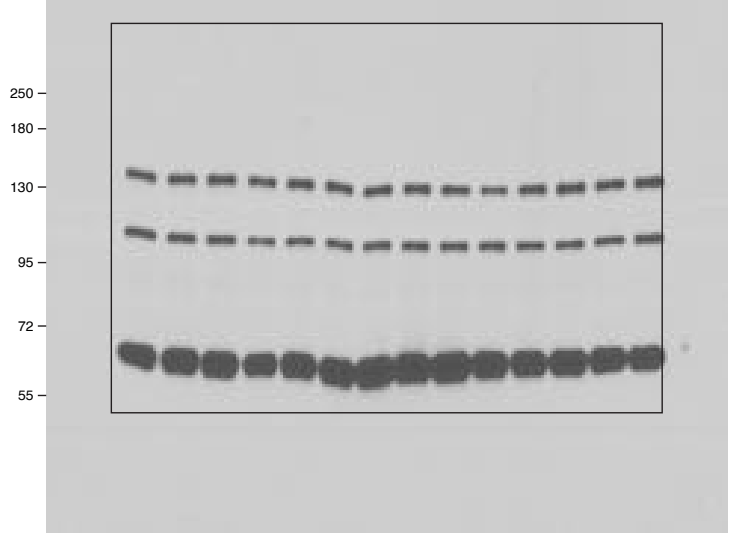

Ext. Data Fig. 8a - NPRL2 (left, long exposure)

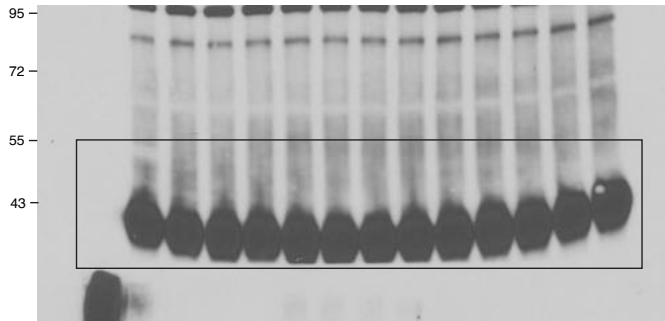

Ext. Data Fig. 8a - NPRL2 (right, long exposure)

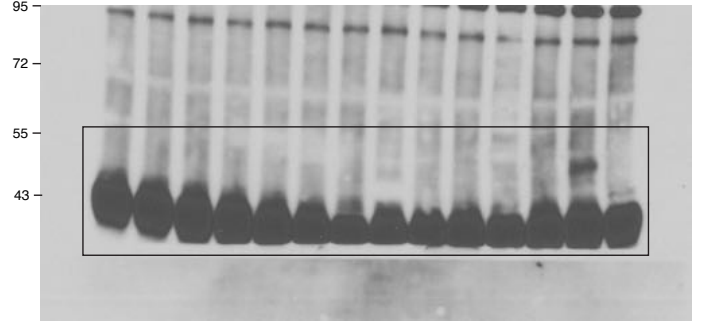

Ext. Data Fig. 8a - NPRL2 (left, short exposure)

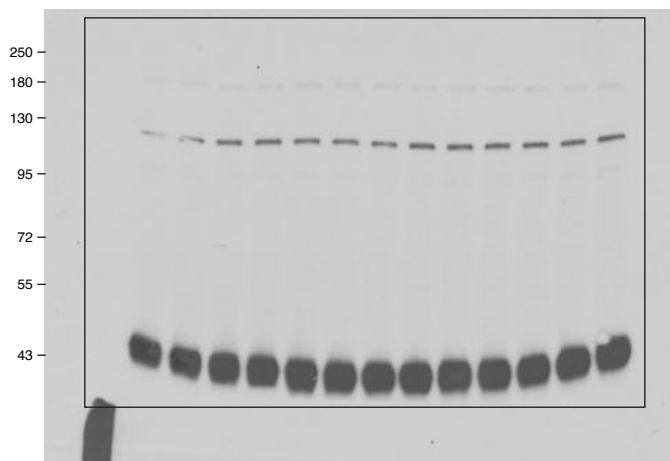

Ext. Data Fig. 8a - NPRL2 (right, short exposure)

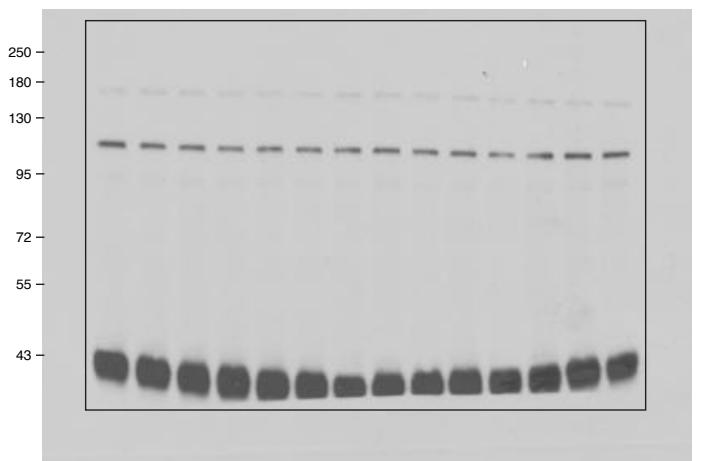

Ext. Data Fig. 8a - Ubiquitin (left)

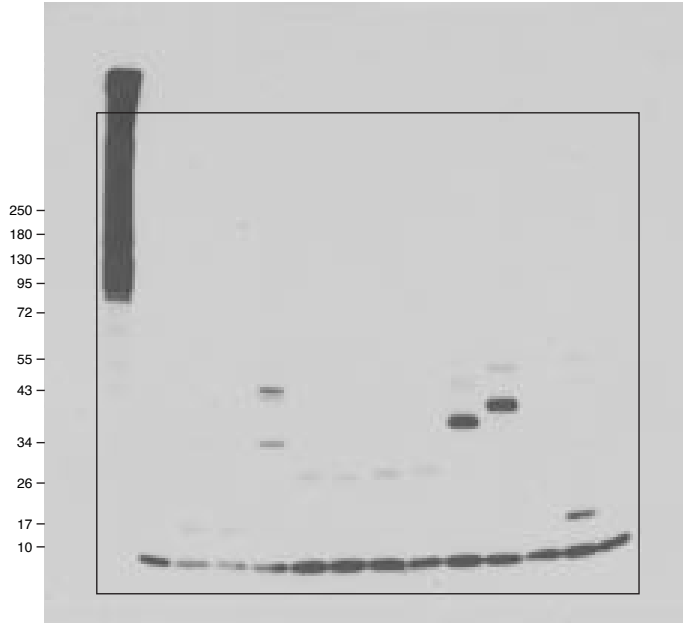

Ext. Data Fig. 8a - Ubiquitin (right)

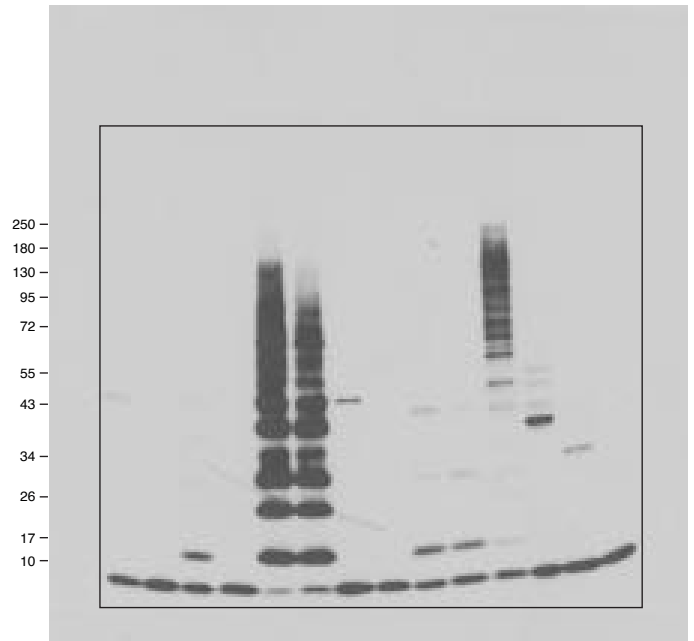

Ext. Data Fig. 8a - MIOS (left)

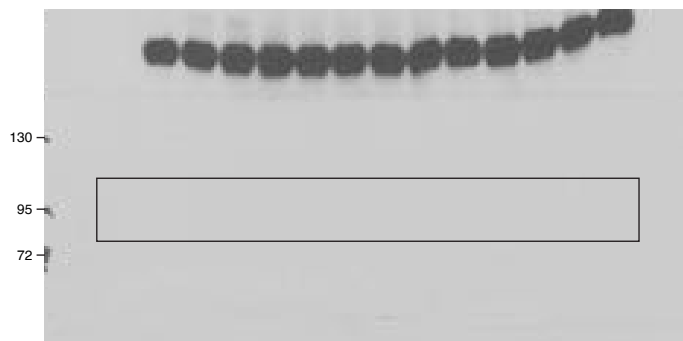

Ext. Data Fig. 8a - MIOS (right)

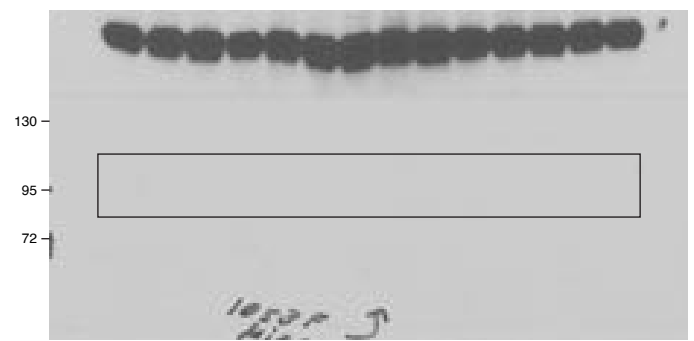

Ext. Data Fig. 8b - DEPDC5 (left)

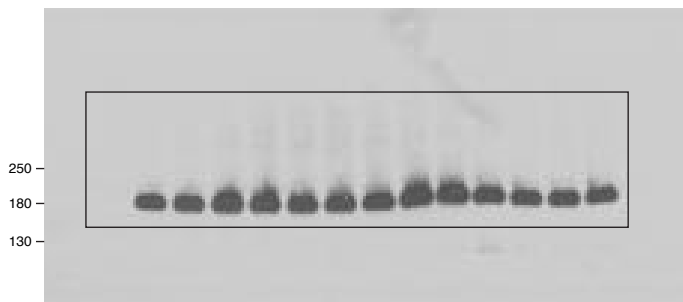

Ext. Data Fig. 8b - DEPDC5 (right)

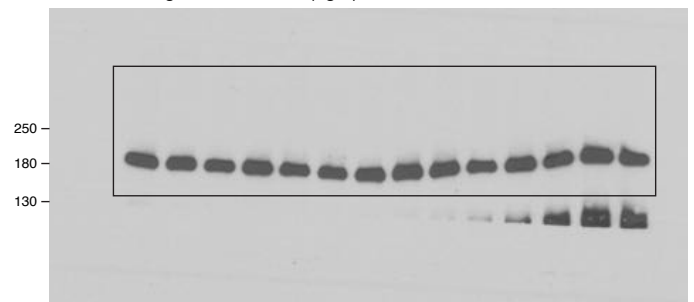

# Supplementary Figure 1 | part 14

Ext. Data Fig. 8b - NPRL3 (left)

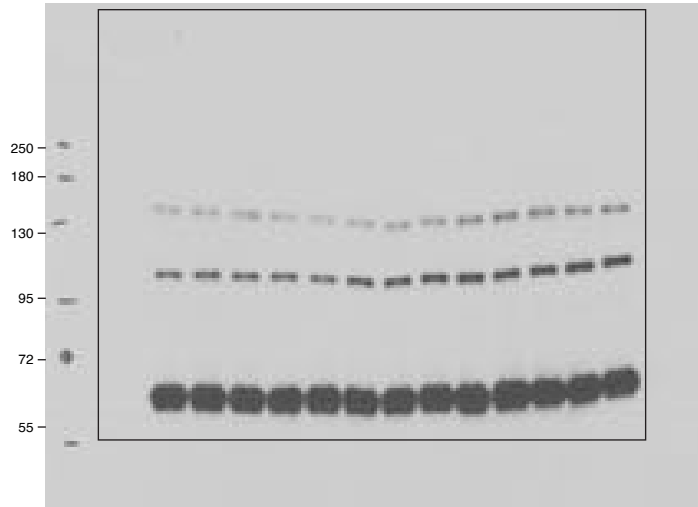

Ext. Data Fig. 8b - NPRL3 (right)

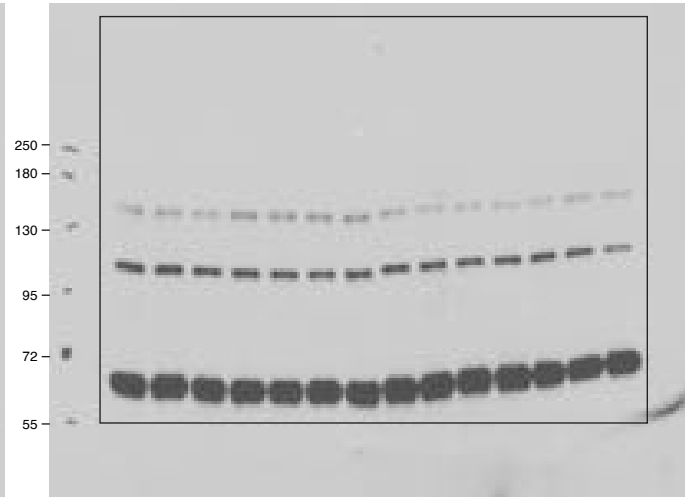

Ext. Data Fig. 8b - NPRL2 (left, long exposure)

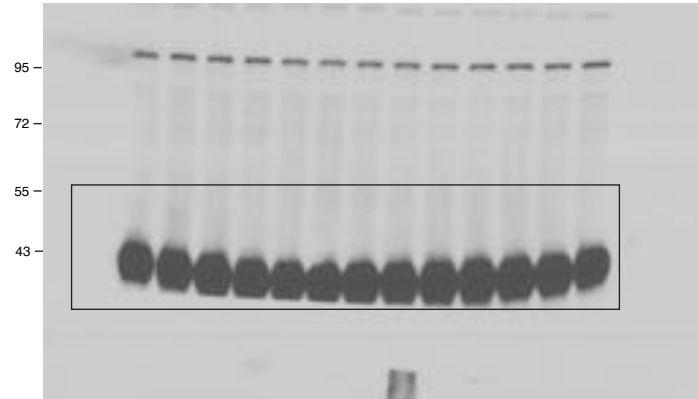

Ext. Data Fig. 8b - NPRL2 (right, long exposure)

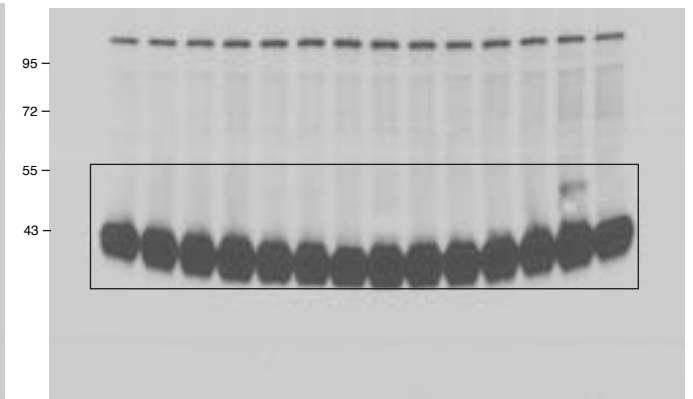

Ext. Data Fig. 8b - NPRL2 (left, short exposure)

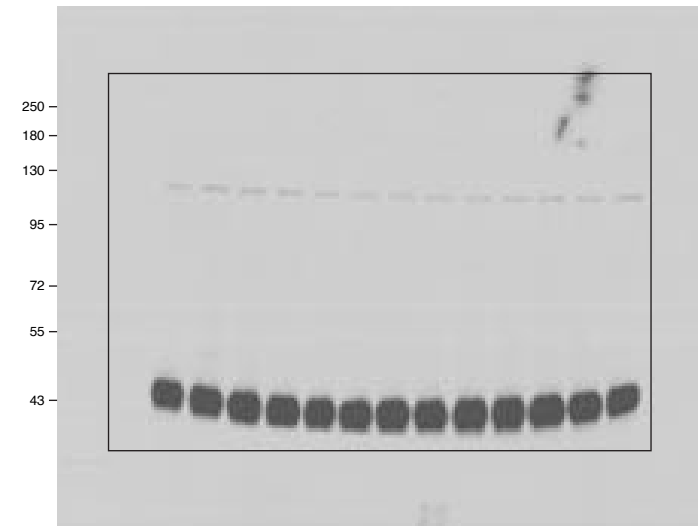

Ext. Data Fig. 8b - NPRL2 (right, short exposure)

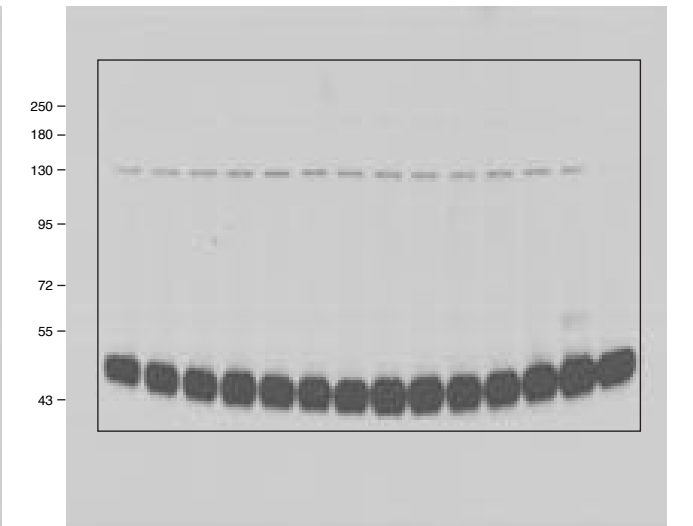

# Supplementary Figure 1 | part 15

Ext. Data Fig. 8b - Ubiquitin (left)

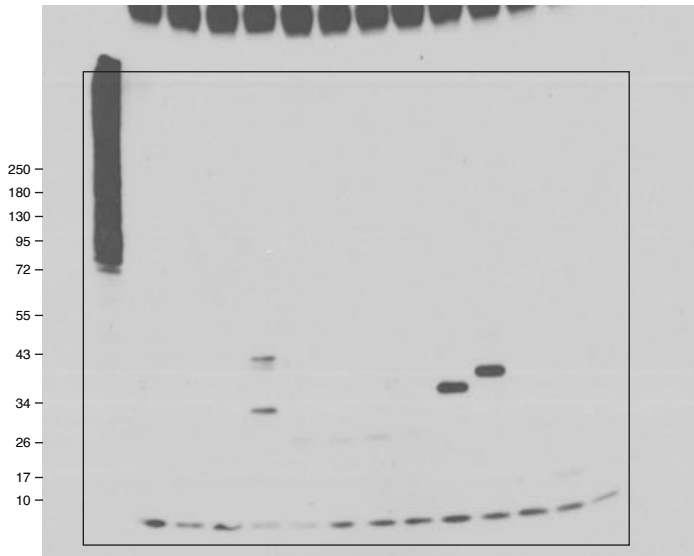

Ext. Data Fig. 8b - Ubiquitin (right)

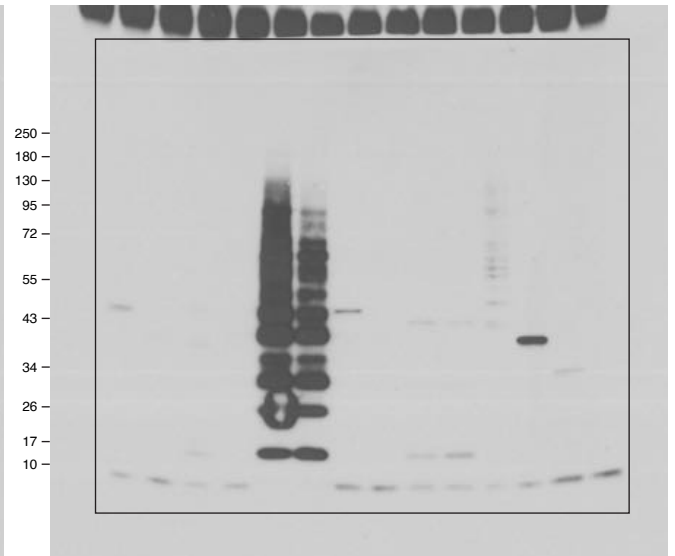

Ext. Data Fig. 8b - MIOS (left)

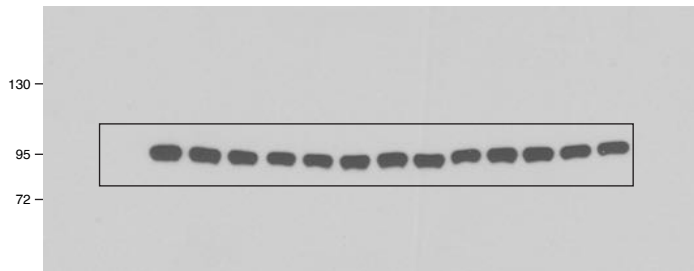

Ext. Data Fig. 8b - MIOS (right)

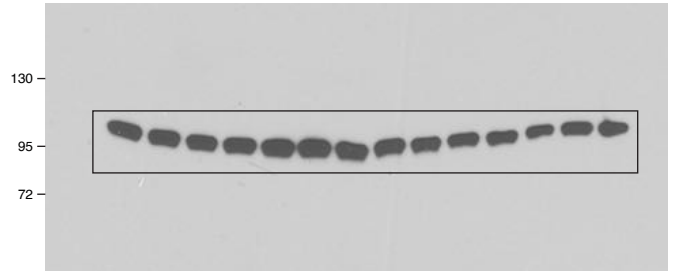

Ext. Data Fig. 8c - Coomassie

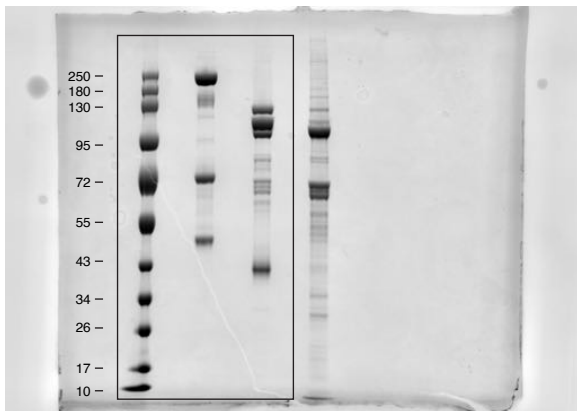

Ext. Data Fig. 8d - Ubiquitin

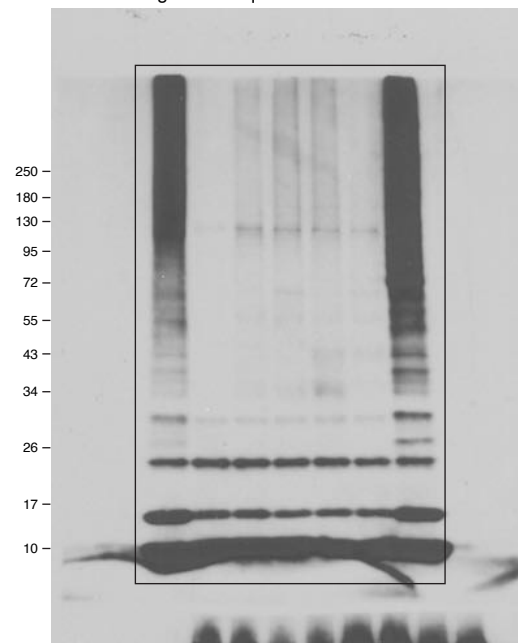

Ext. Data Fig. 8d - FLAG

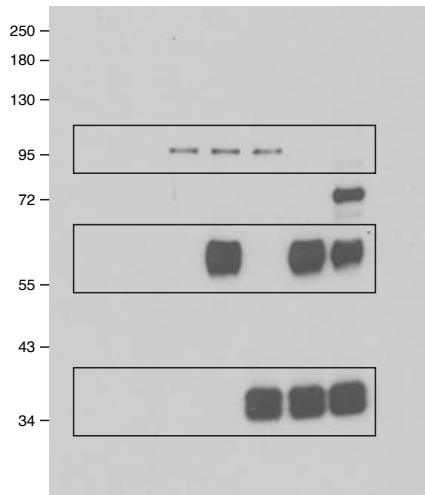

Ext. Data Fig. 8e - Coomassie

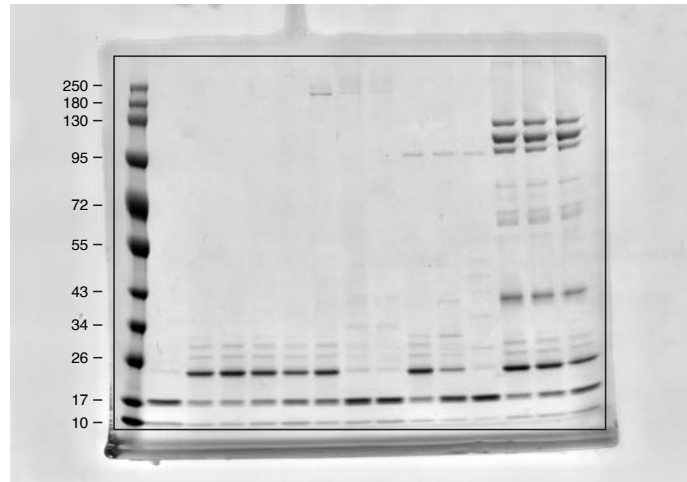

Ext. Data Fig. 8f - S6K pT389 (short exposure)

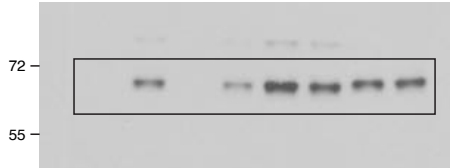

Ext. Data Fig. 8f - Ubiquitin conjugates

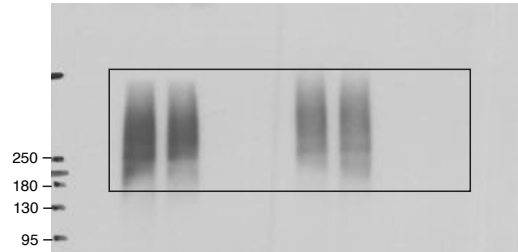

Ext. Data Fig. 8f - S6K pT389 (long exposure)

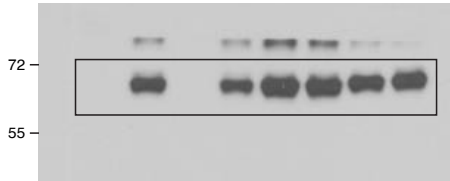

Ext. Data Fig. 8f - UBE2D

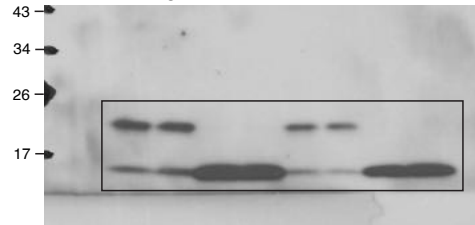

Ext. Data Fig. 8f - S6K

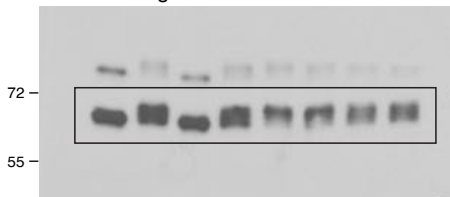

Ext. Data Fig. 8f - HIF1α

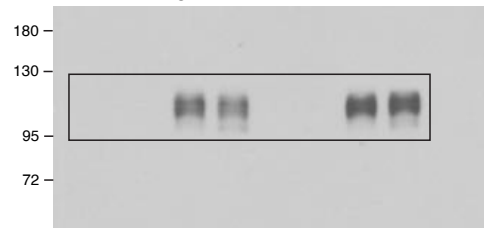

Ext. Data Fig. 8f - ULK1 pS757

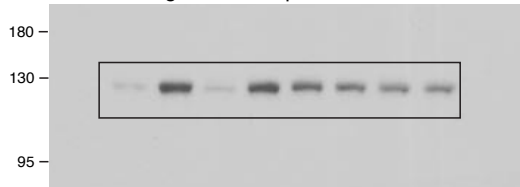

Ext. Data Fig. 8f - NRF2

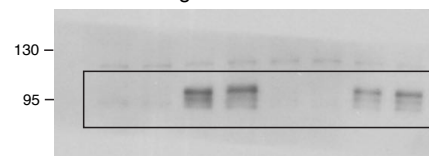

Ext. Data Fig. 8f - ULK1

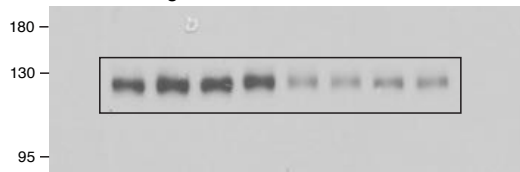

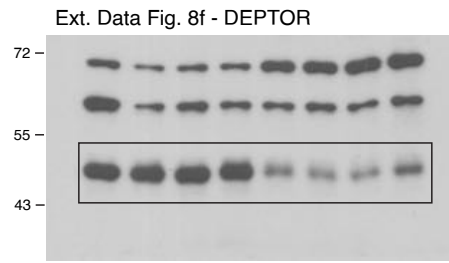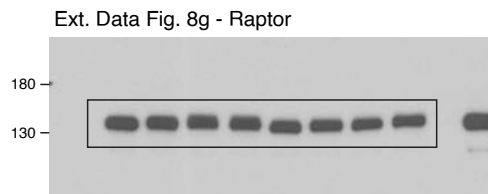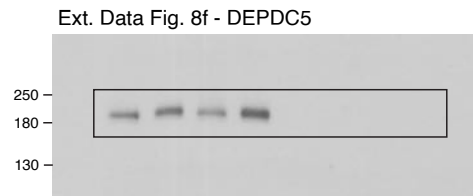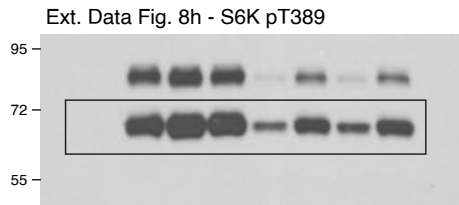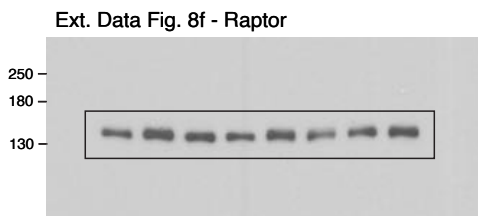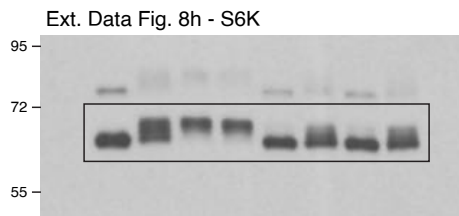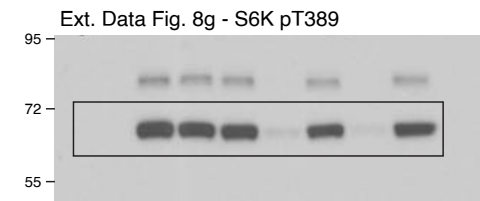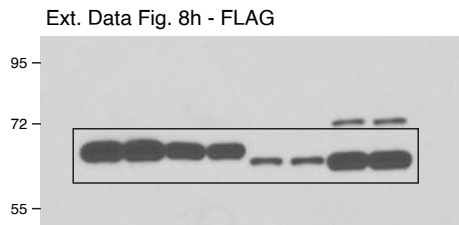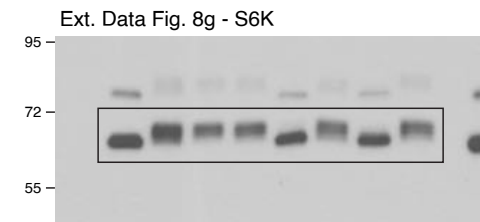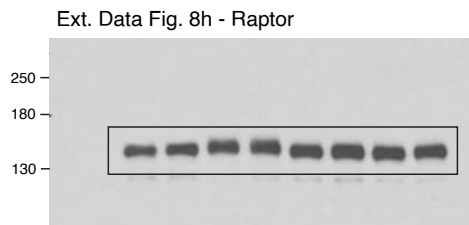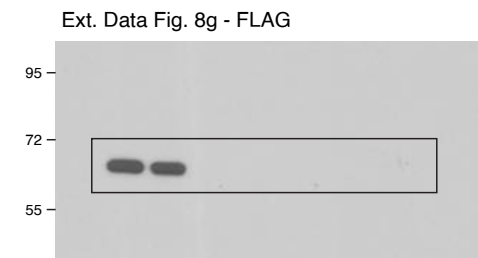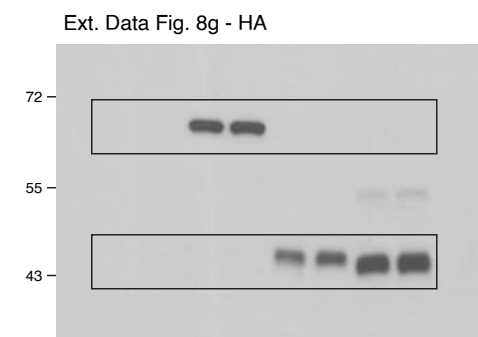

# Supplementary Figure 1 | part 18

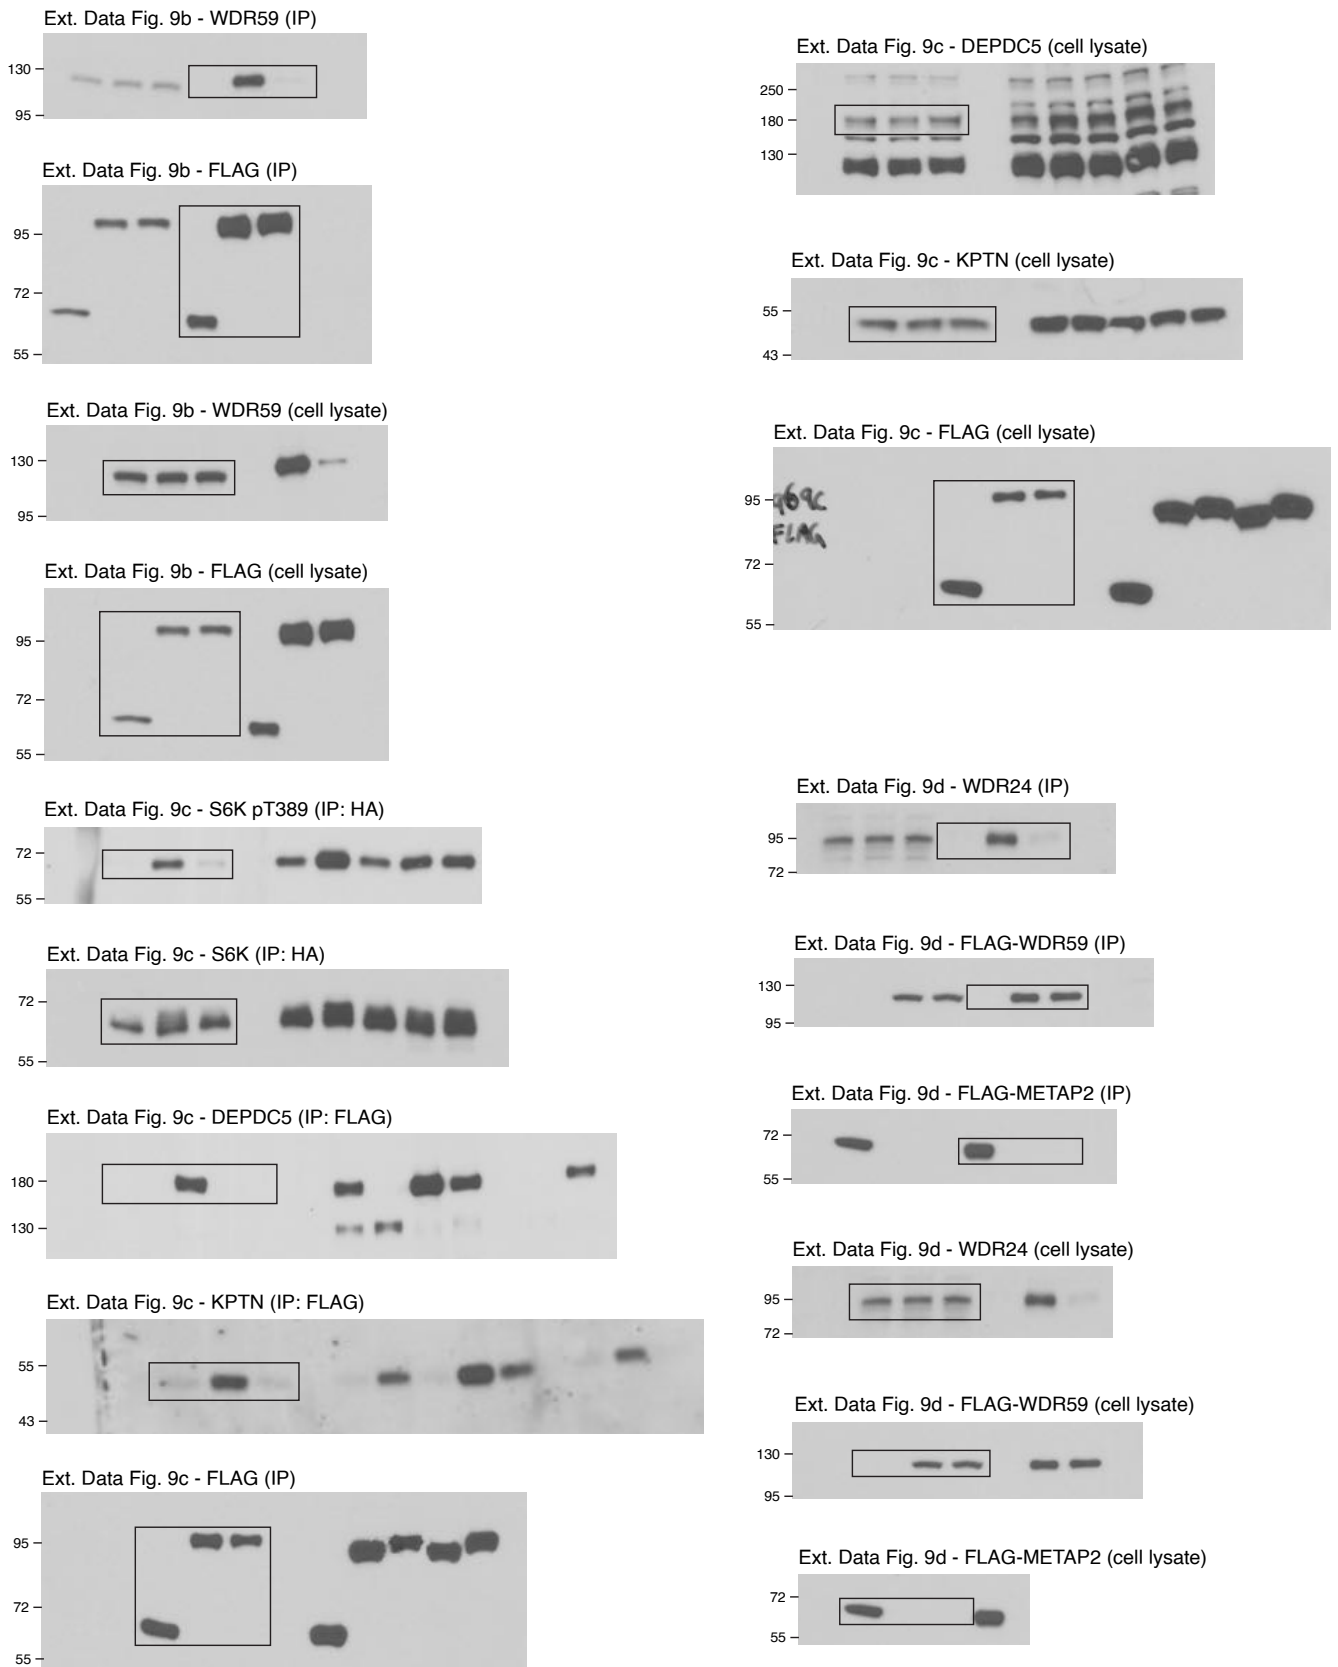

# Supplementary Figure 1 | part 19

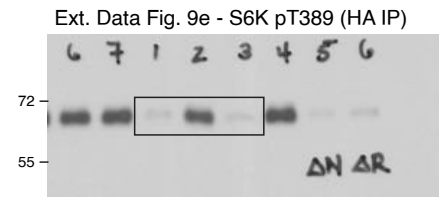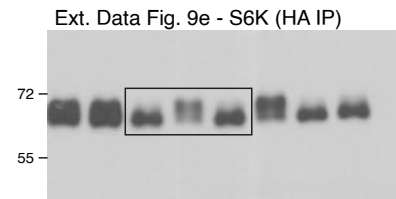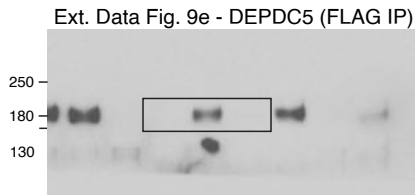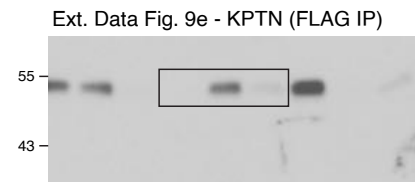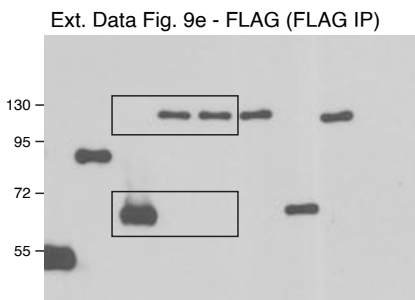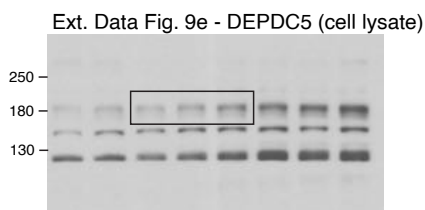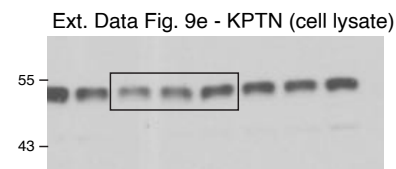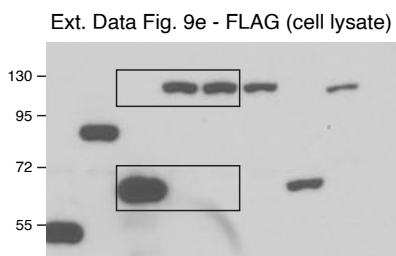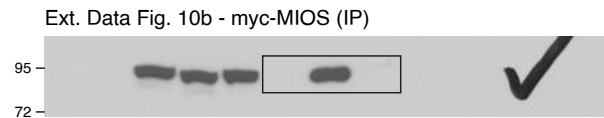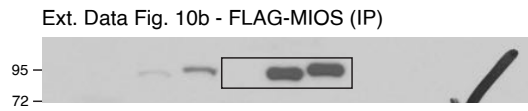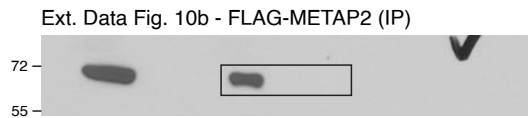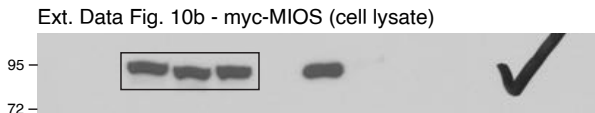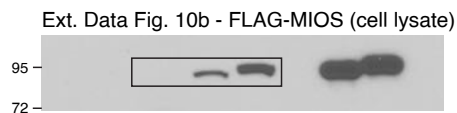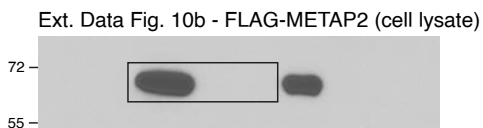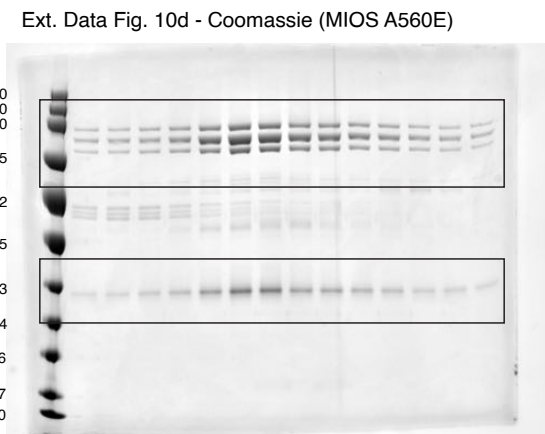



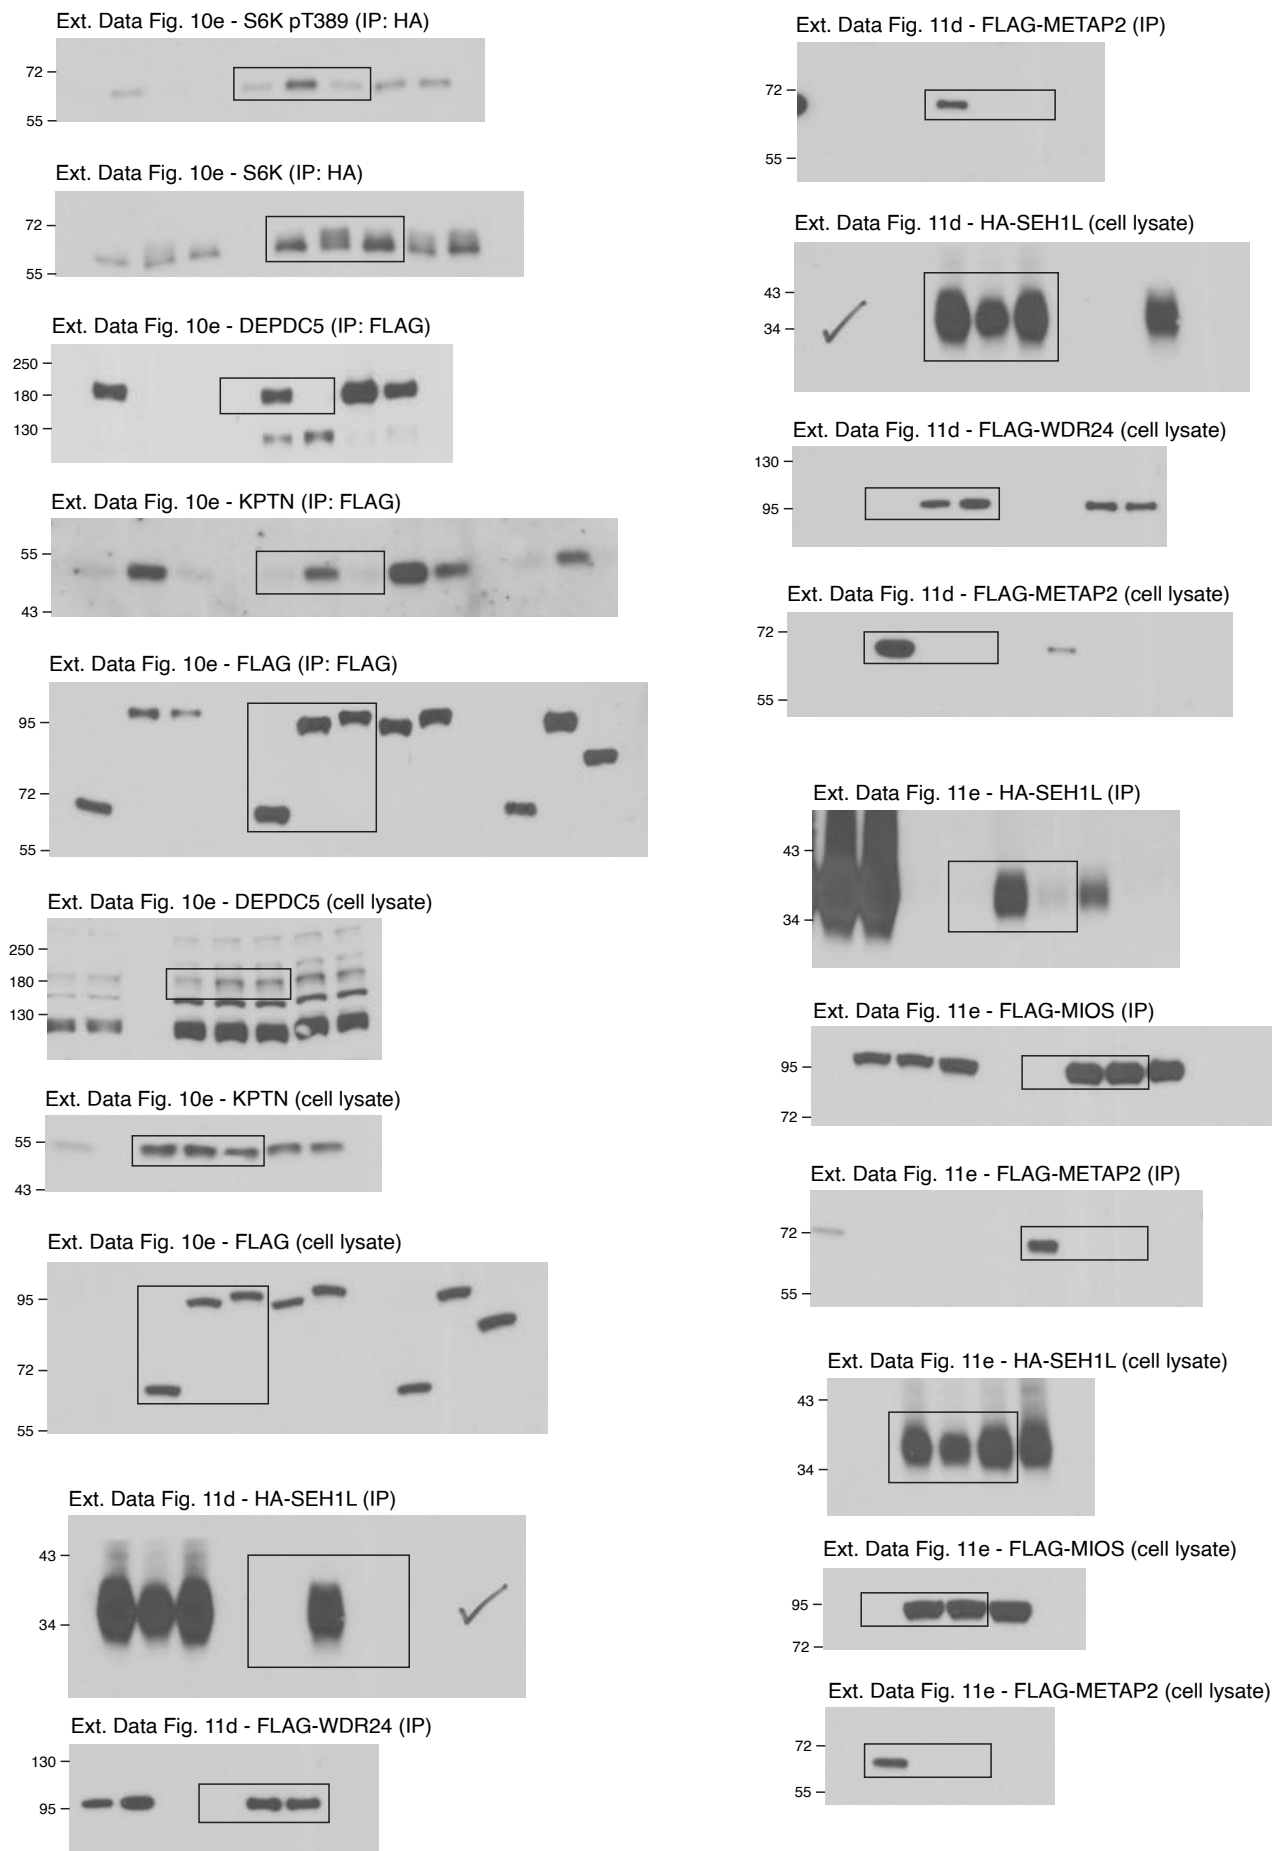

# Supplementary Figure 1 | part 21

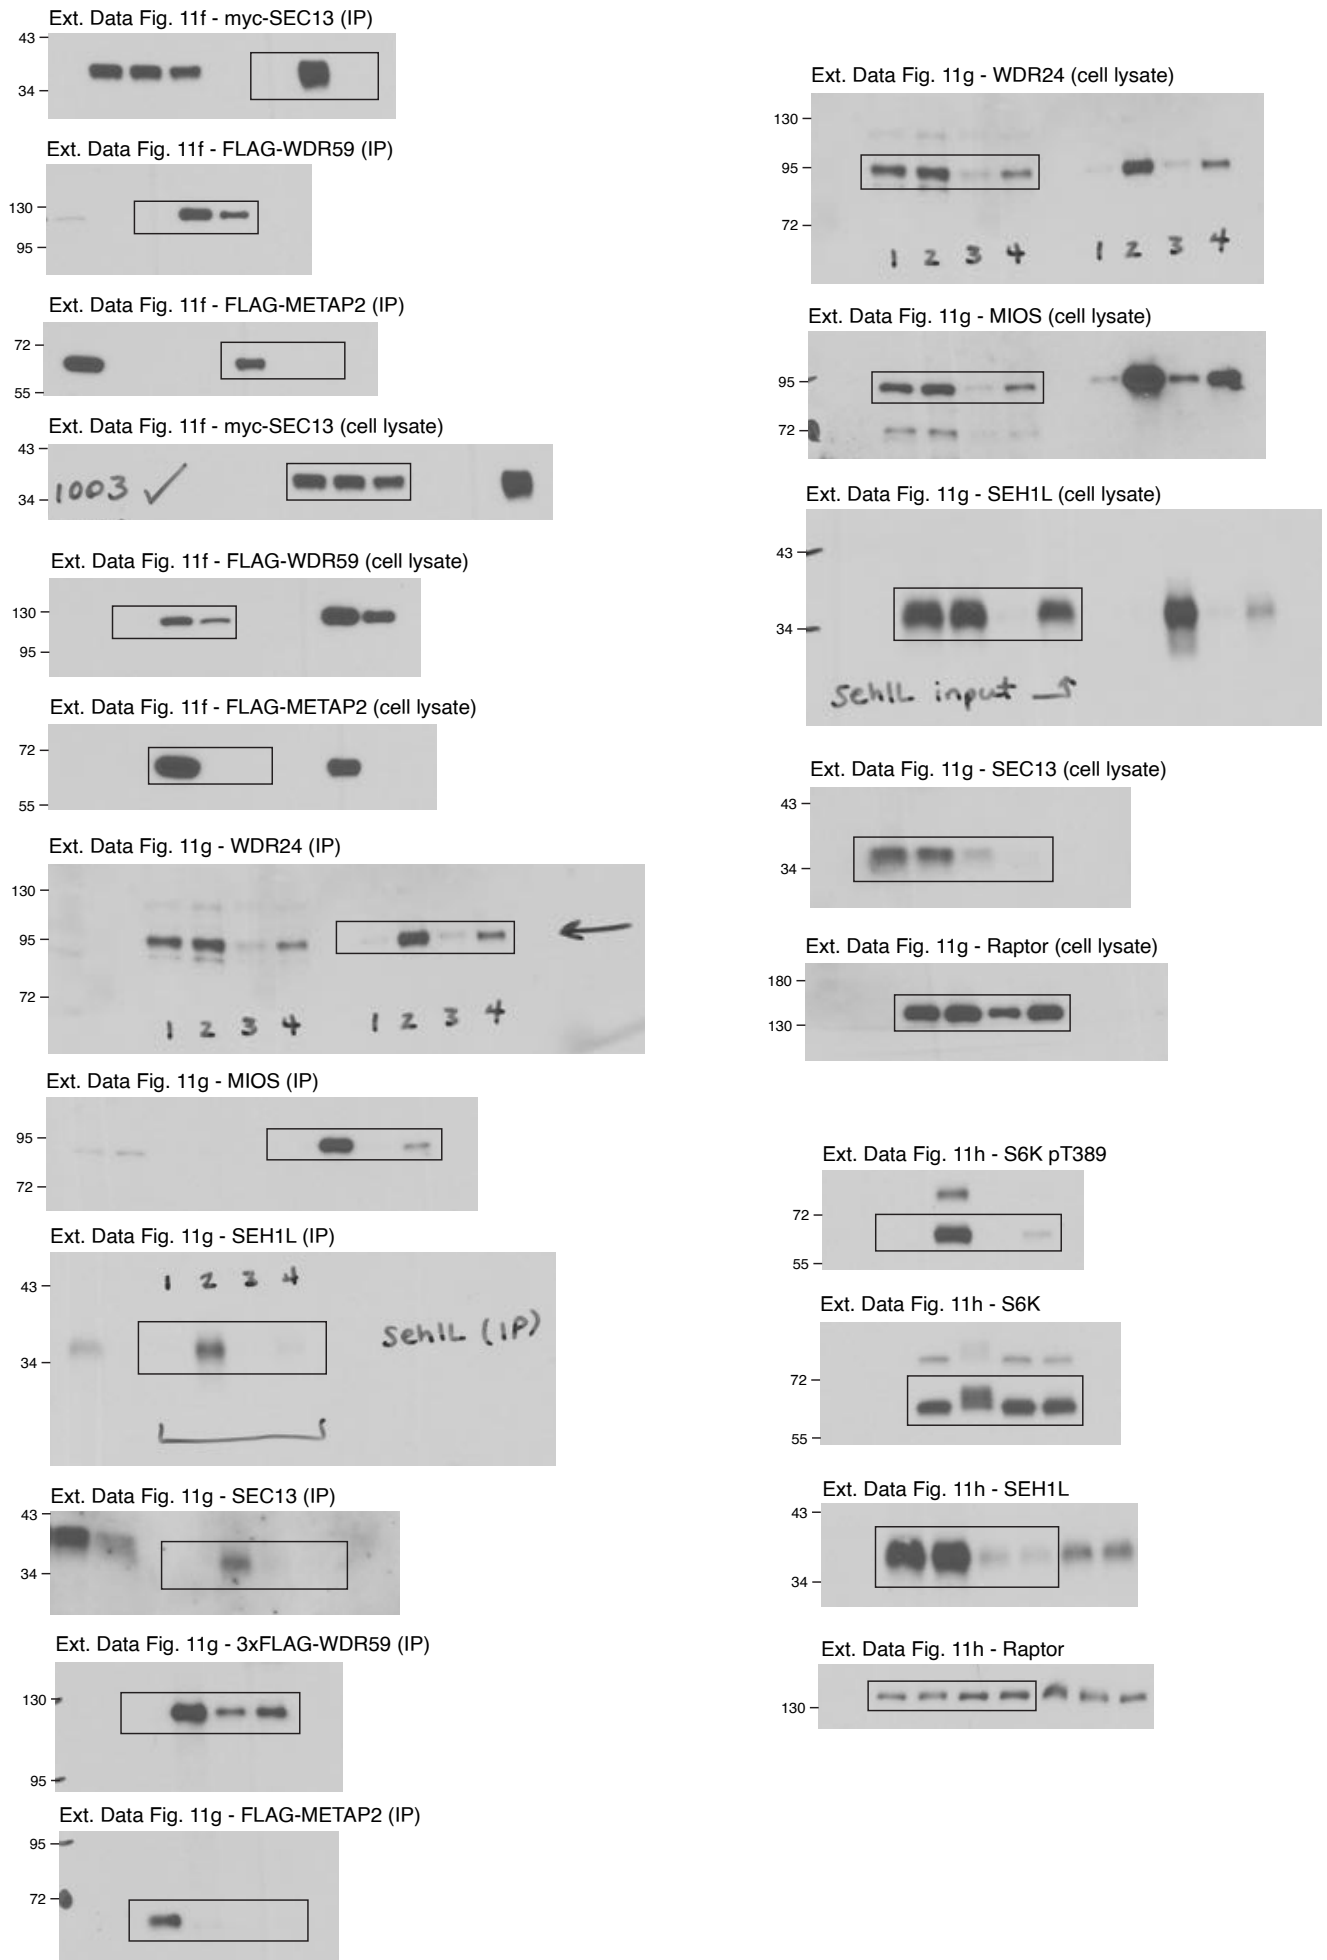

# Supplementary Figure 1 | part 22

Ext. Data Fig. 11i - S6K pT389

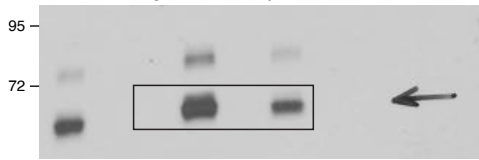

Ext. Data Fig. 11i - S6K

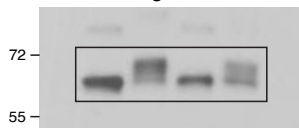

Ext. Data Fig. 11i - SEC13

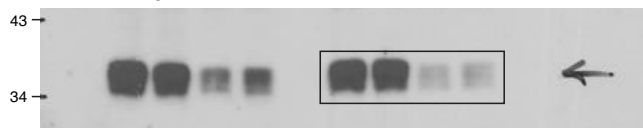

Ext. Data Fig. 11i - Raptor

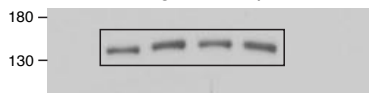

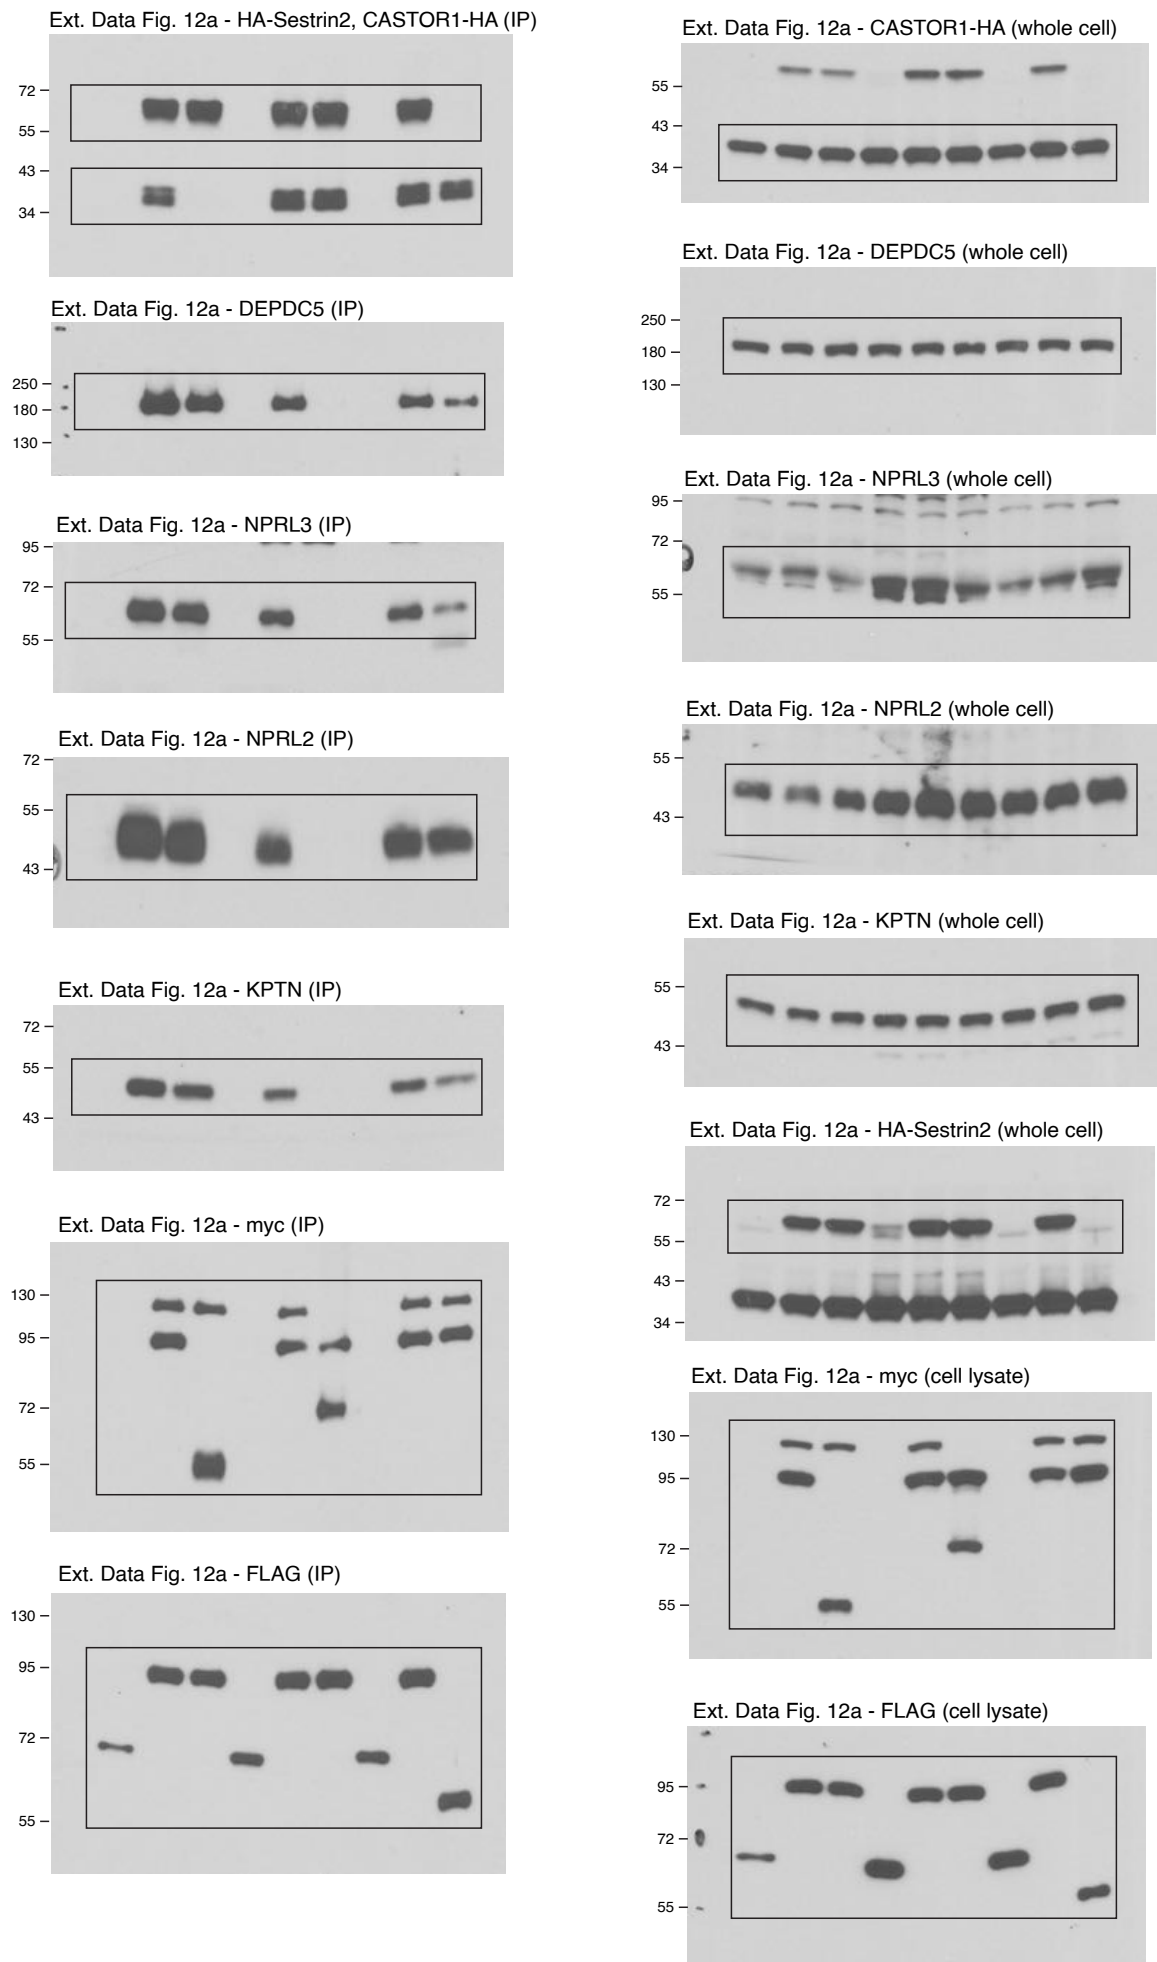

# Supplementary Figure 1 | part 24

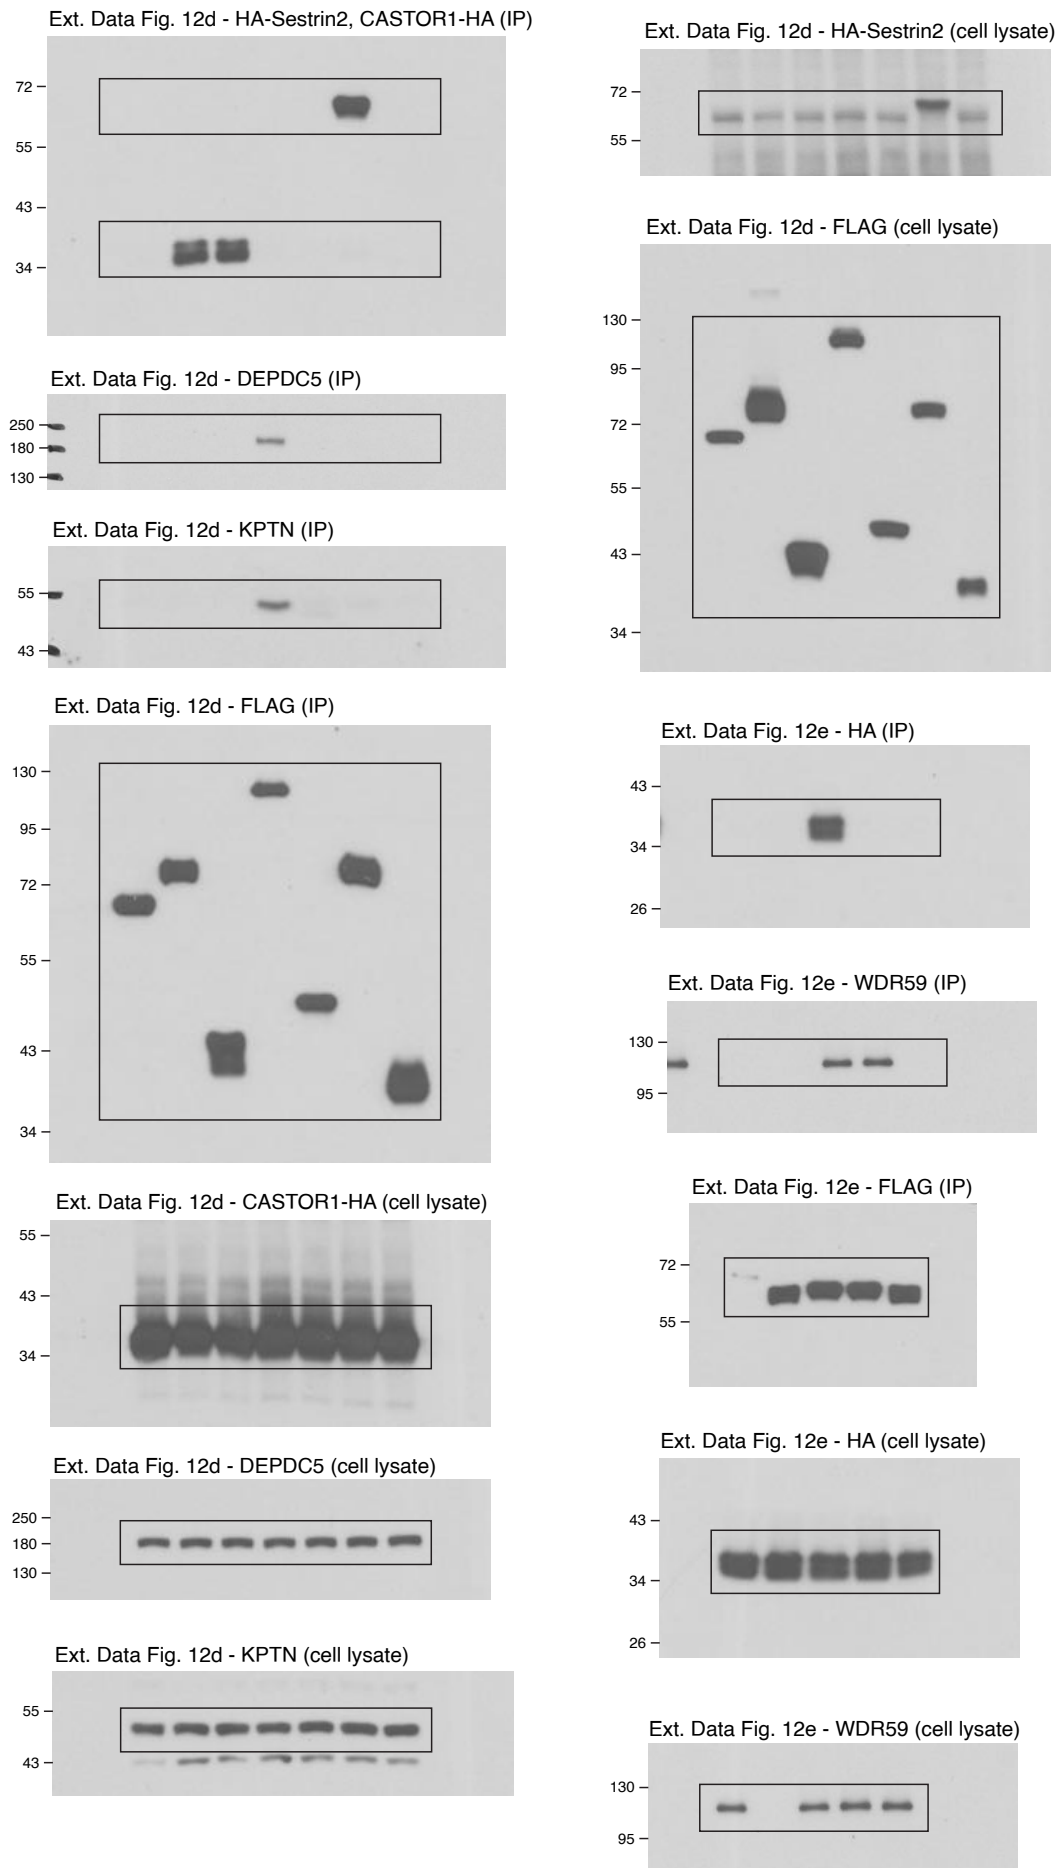

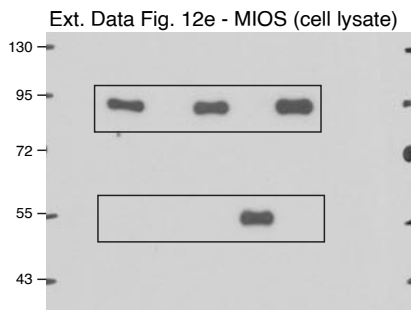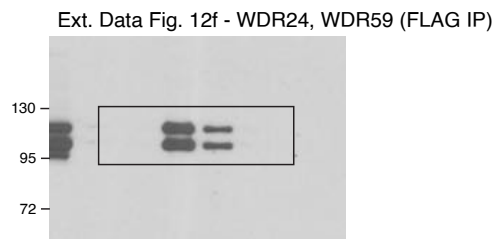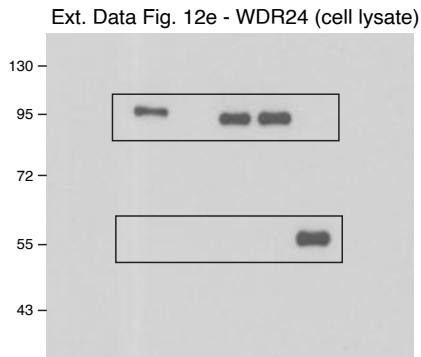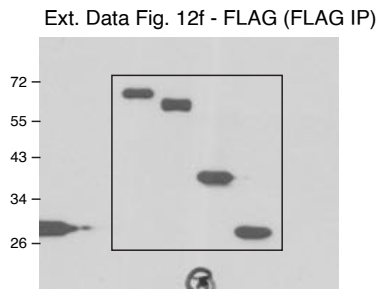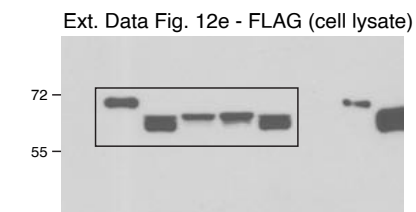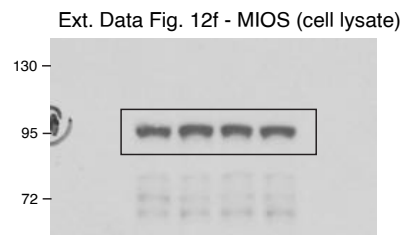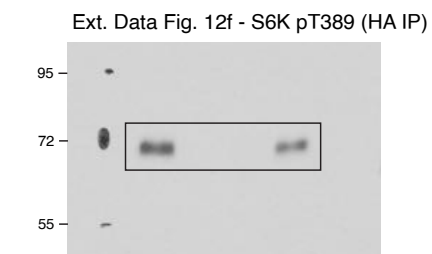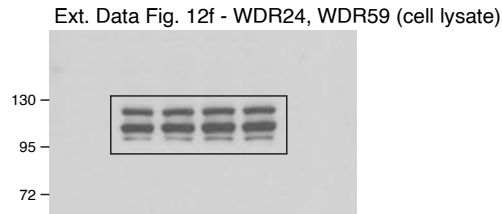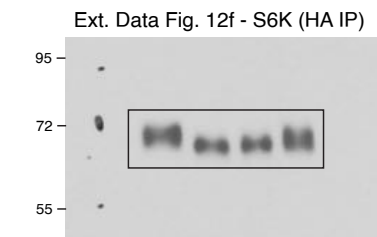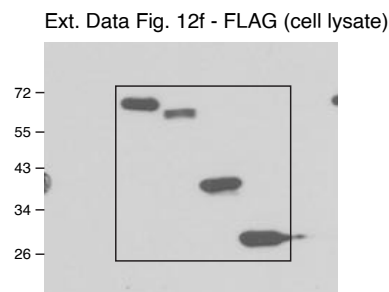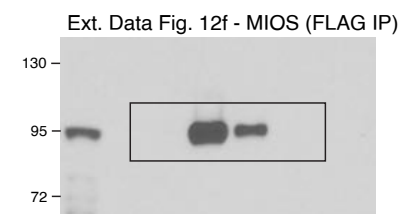

Ext. Data Fig. 12g - HA (FLAG IP)

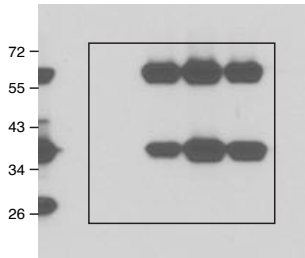

Ext. Data Fig. 12h - NPRL3 (FLAG IP)

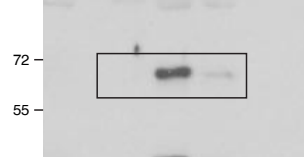

Ext. Data Fig. 12g - FLAG (IP)

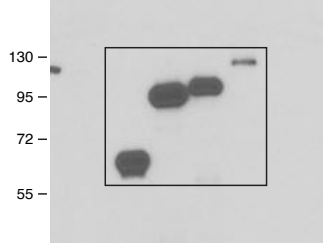

Ext. Data Fig. 12h - FLAG (FLAG IP)

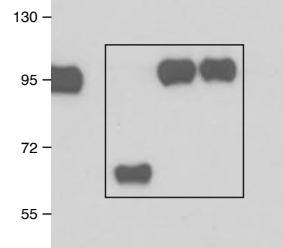

Ext. Data Fig. 12g - HA (cell lysate)

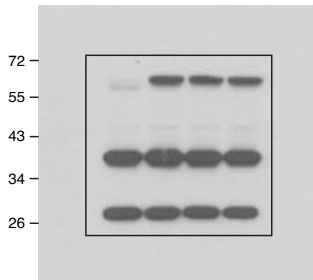

Ext. Data Fig. 12h - RagA, RagC (cell lysate)

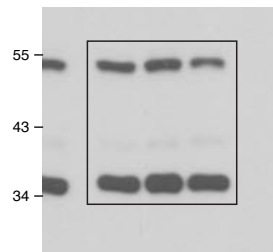

Ext. Data Fig. 12g - FLAG (cell lysate)

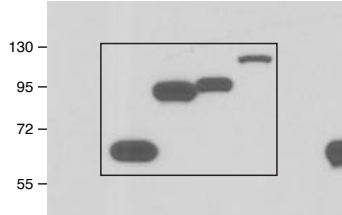

Ext. Data Fig. 12h - DEPDC5 (cell lysate)

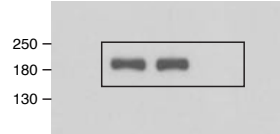

Ext. Data Fig. 12h - RagA, RagC (FLAG IP)

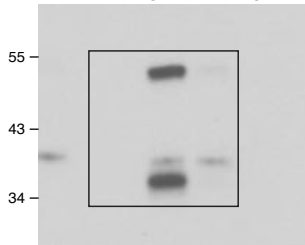

Ext. Data Fig. 12h - NPRL3 (cell lysate)

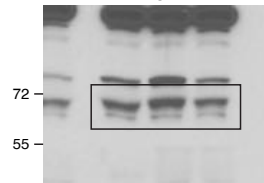

Ext. Data Fig. 12h - DEPDC5 (FLAG IP)

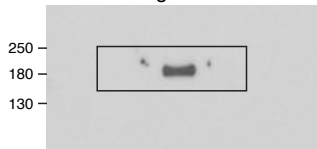

Ext. Data Fig. 12h - FLAG (cell lysate)

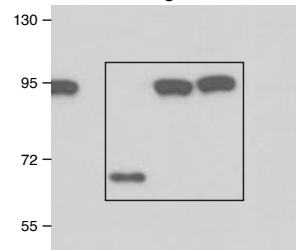

# Supplementary Figure 1 | part 27

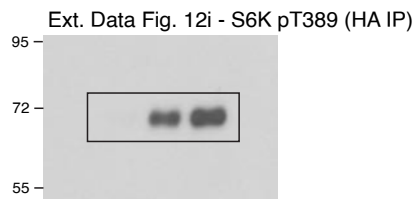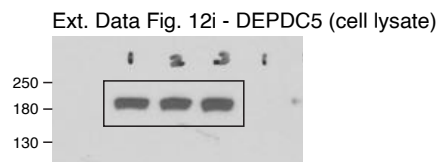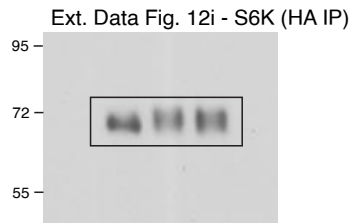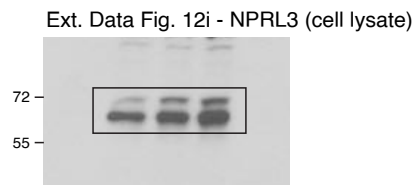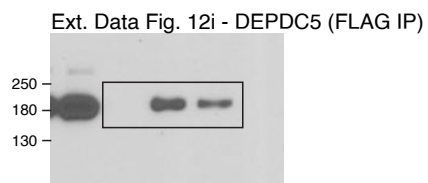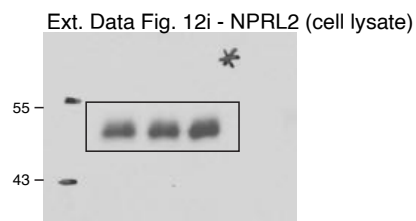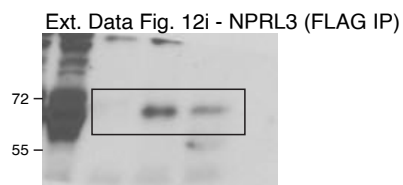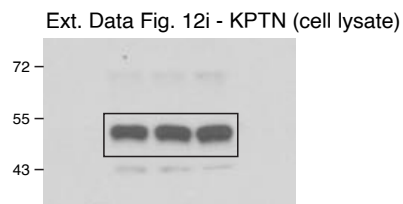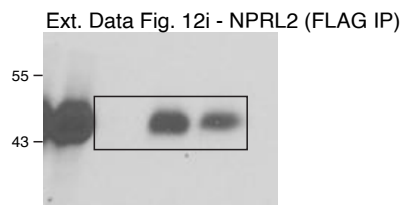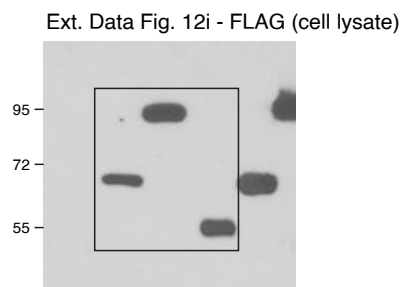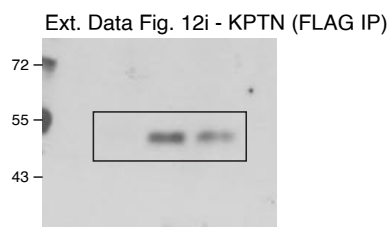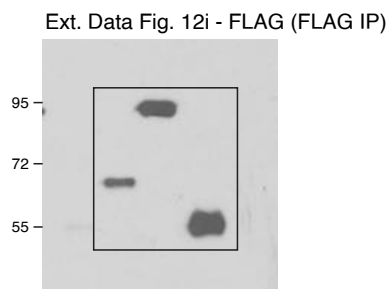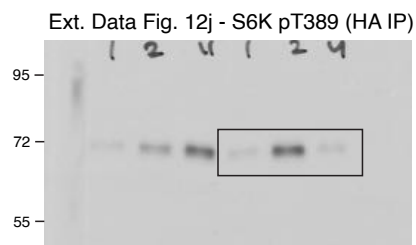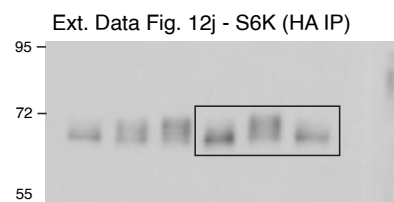



# Supplementary Figure 1 | part 28

Ext. Data Fig. 12j - DEPDC5 (FLAG IP)

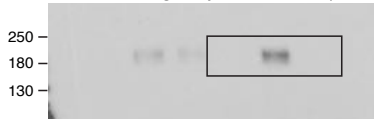

Ext. Data Fig. 12j - KPTN (FLAG IP)

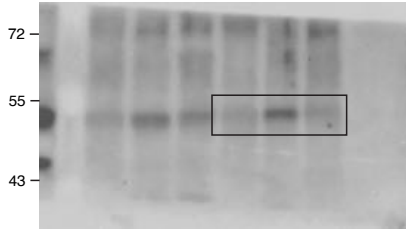

Ext. Data Fig. 12j - FLAG (FLAG IP)

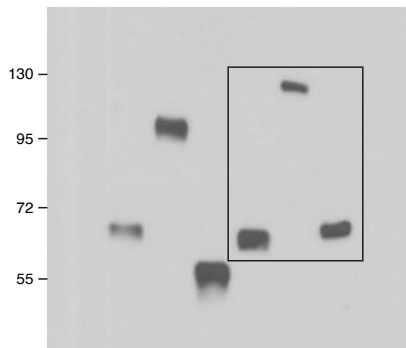

Ext. Data Fig. 12j - DEPDC5 (cell lysate)

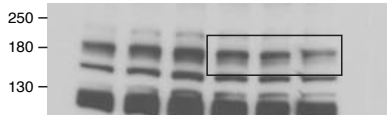

Ext. Data Fig. 12j - KPTN (cell lysate)

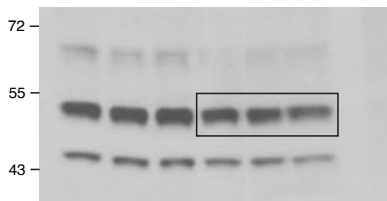

Ext. Data Fig. 12j - FLAG (cell lysate)

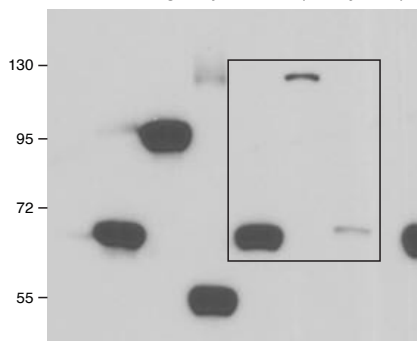

# Supplementary Figure 2

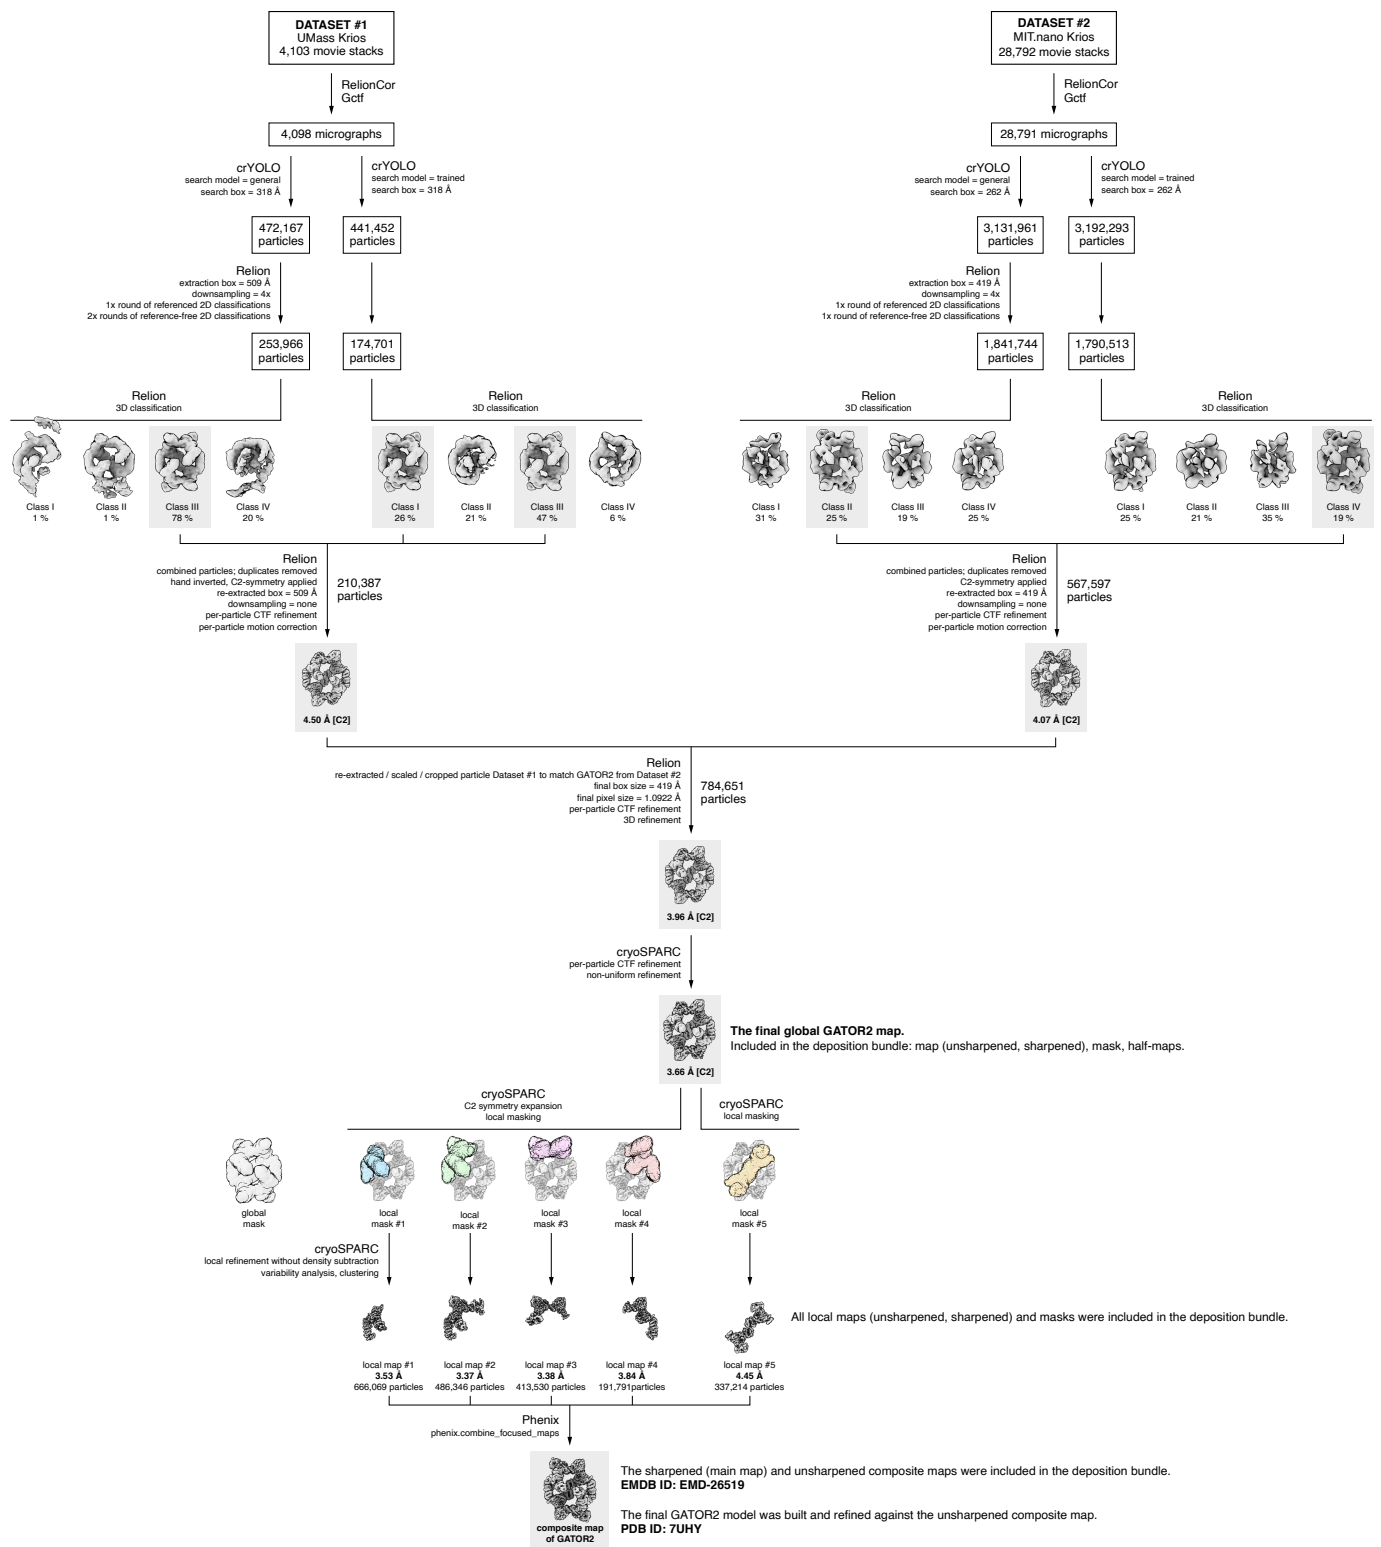

**Supplementary Fig. 2 | Cryo-EM data collection and processing.** Workflow for data collection and processing of the GATOR2 datasets.

# Supplementary Figure 3

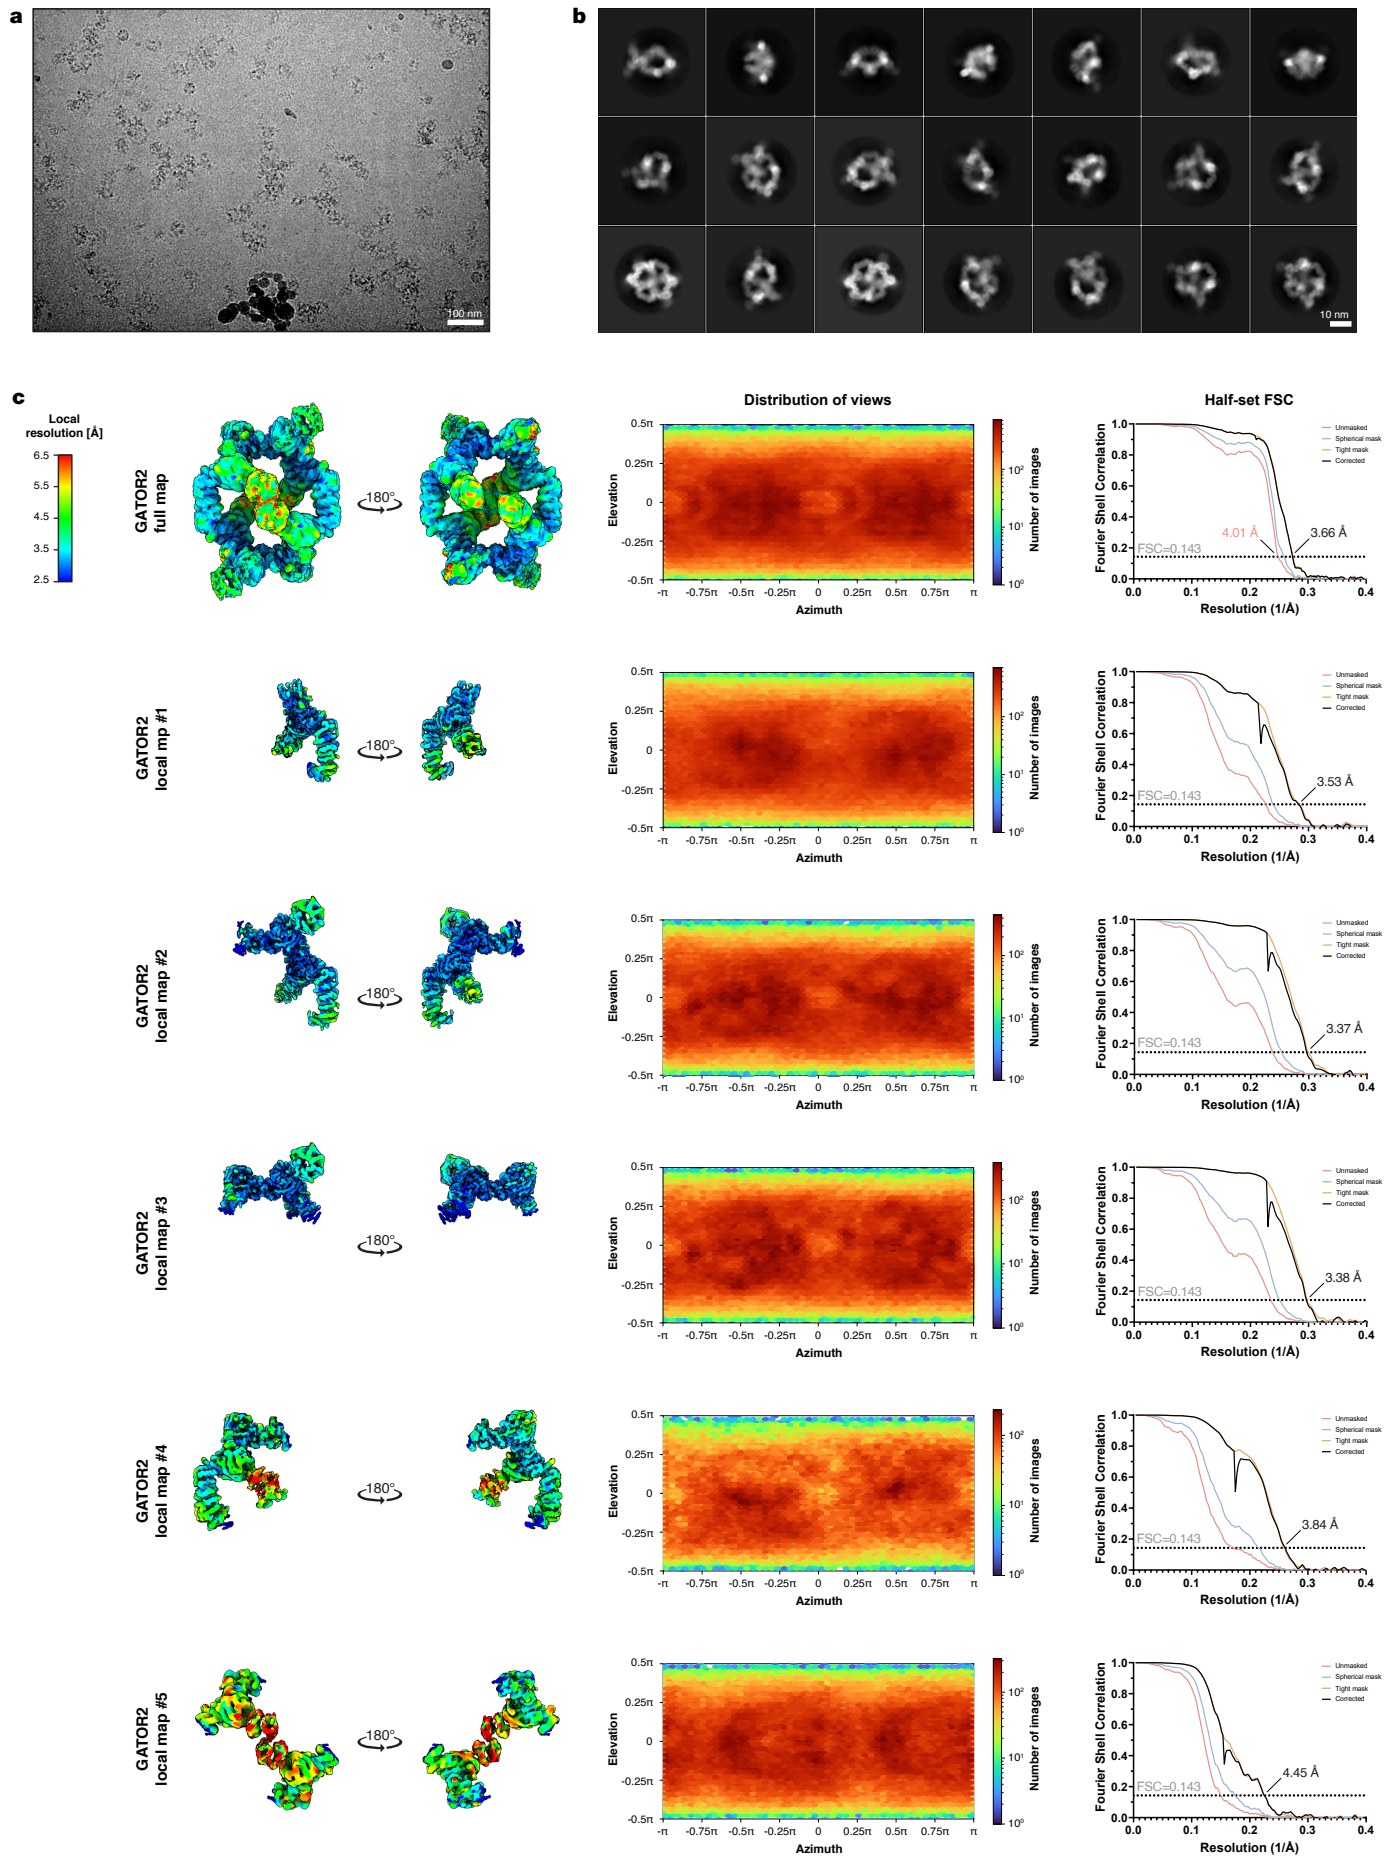

**Supplementary Fig. 3 | Structural determination of GATOR2. a**, Representative micrograph of grids spotted with GATOR2. **b**, Representative two-dimensional class averages of the GATOR2 complex. **c**, Local resolution, view angle distribution, and half-set gold-standard Fourier shell correlation (FSC) for the full GATOR2 map (top) and local maps used for generation of a composite map.

## Supplementary Figure 4

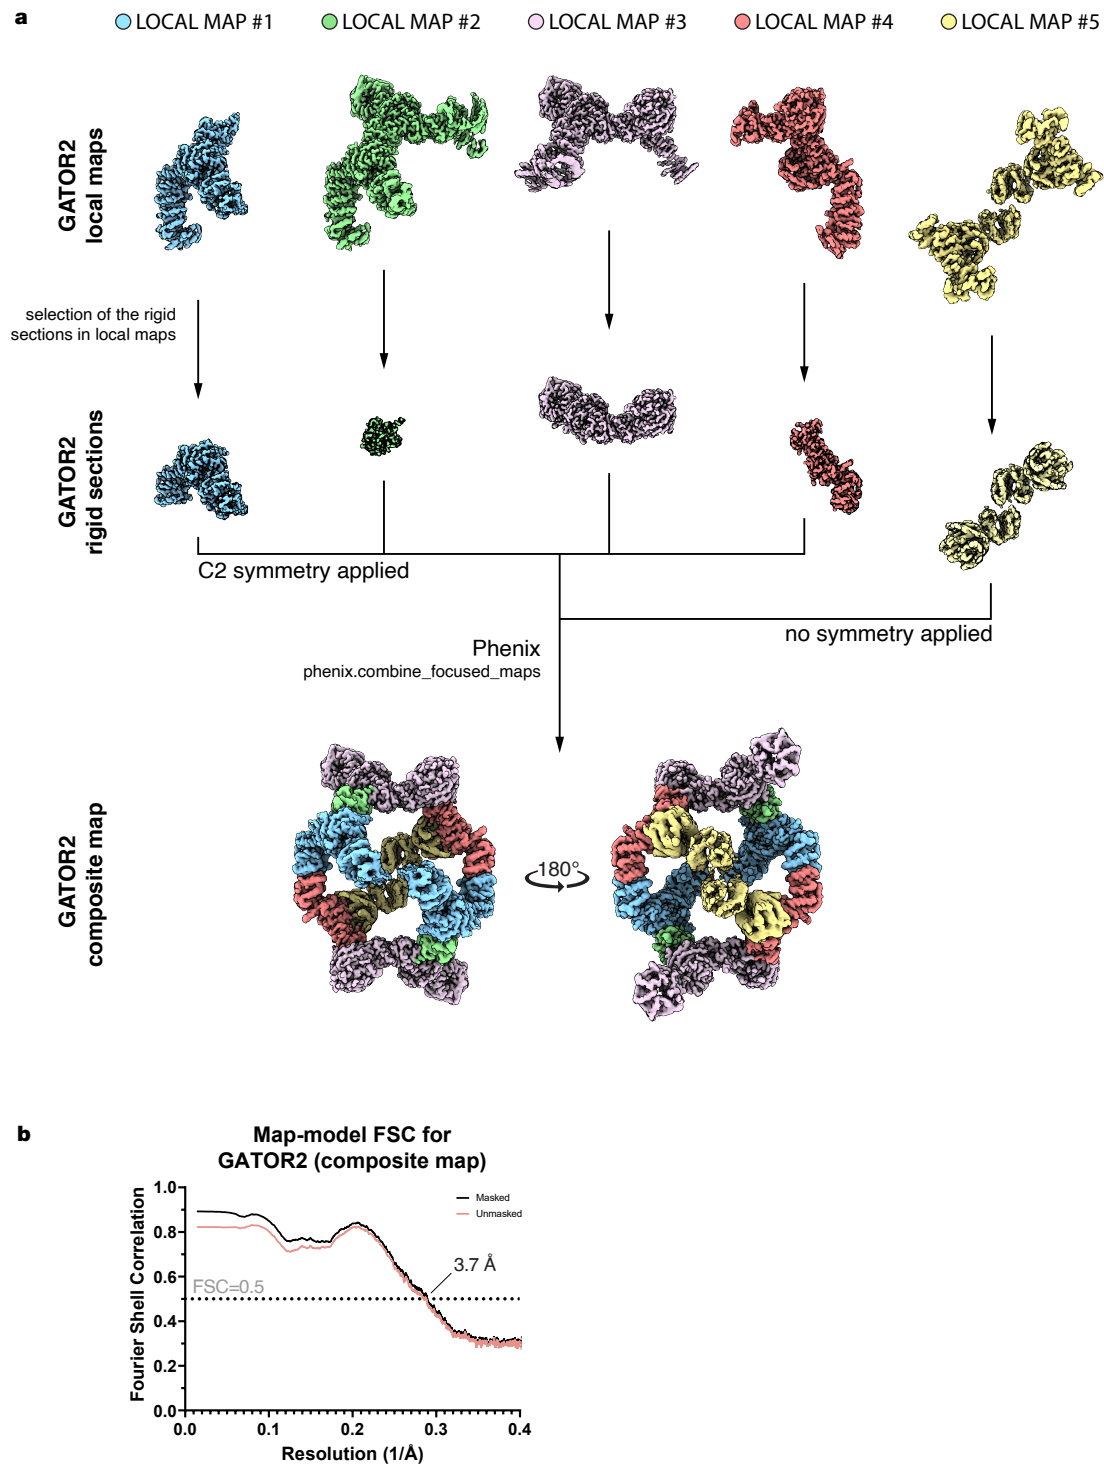

**Supplementary Fig. 4 | Generation of a composite GATOR2 map. a,** Flowchart depicting the assembly of a composite, high occupancy, GATOR2 map from rigid sections of local maps. **b,** Map-model FSC for the GATOR2 composite map.



# Supplementary Figure 5

## MIOS

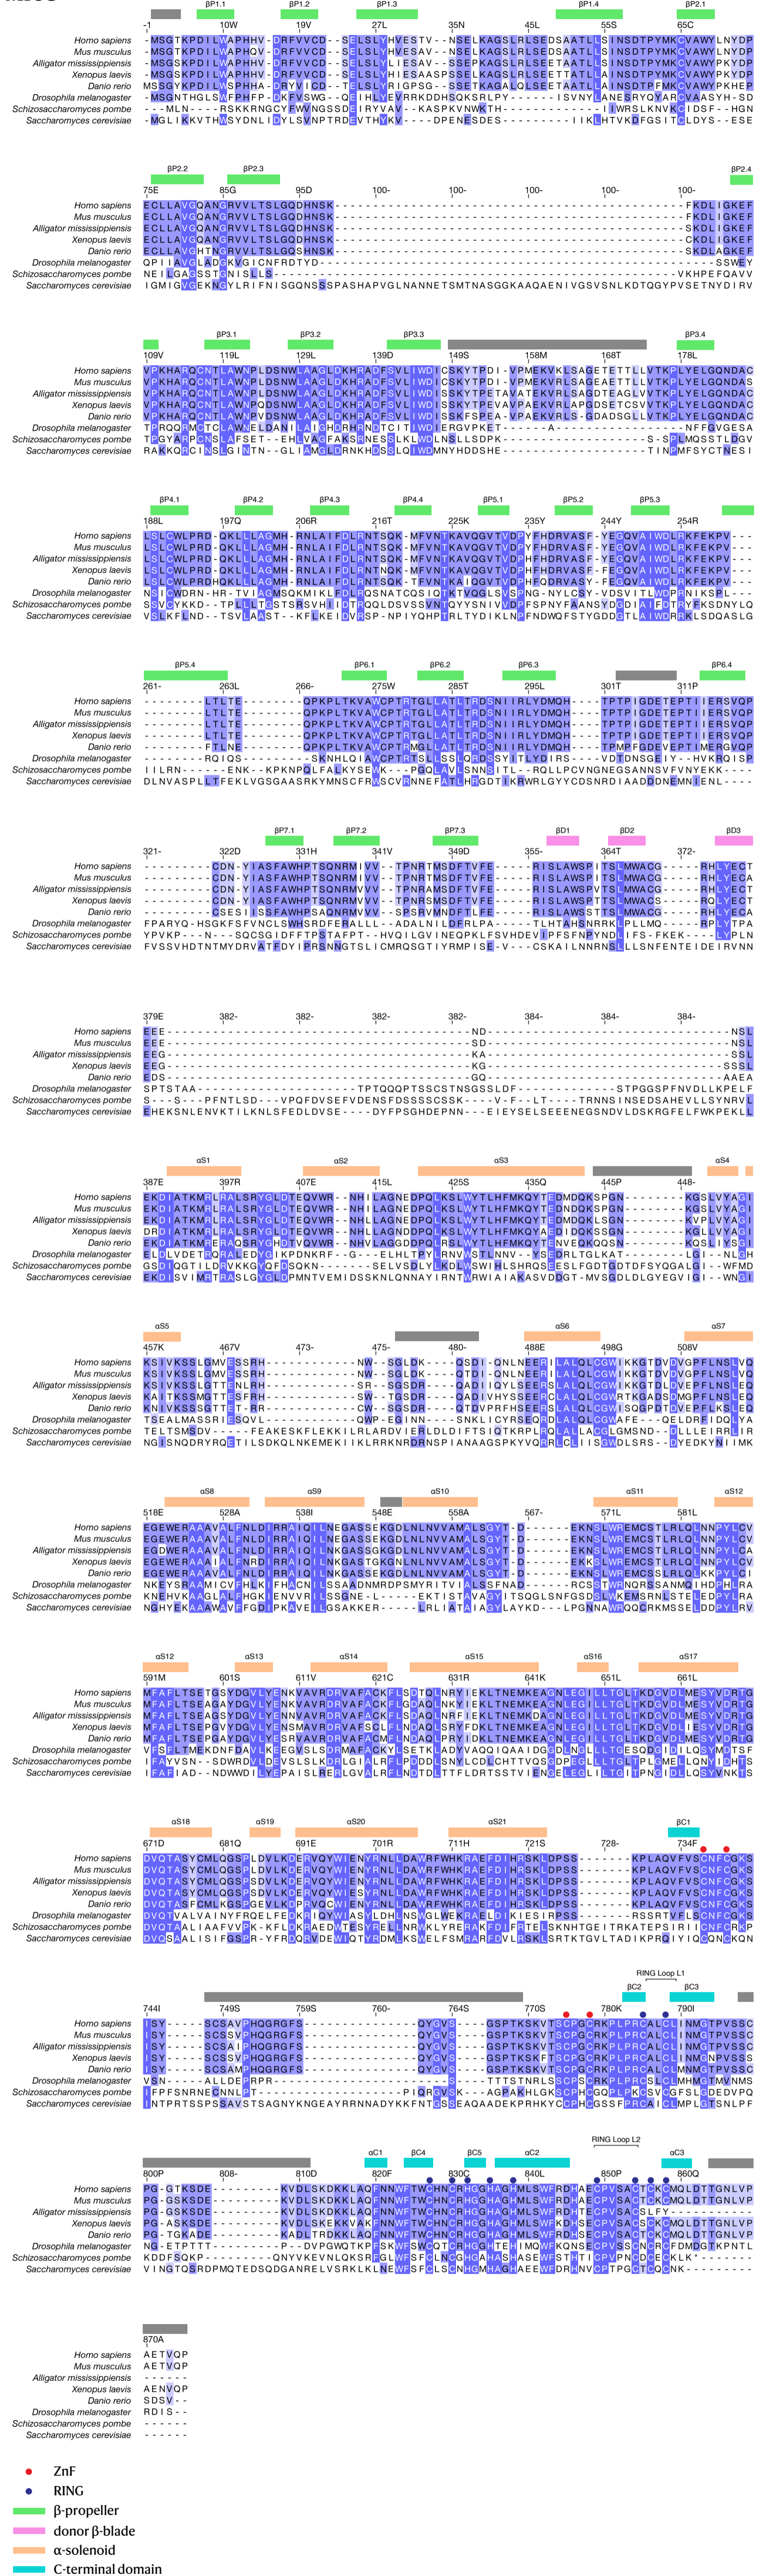

**Supplementary Fig. 5 | Sequence alignment of MIOS.** Sequence alignment of MIOS from various organisms. Residues are colored by percentage identity. Numbering refers to the human protein sequence. Secondary structure boundaries are indicated above the sequence alignment and are colored by domain. Residues that participate in zinc ion coordination are labeled with either red (ZnF) or blue circles (RING). Dark grey rectangles indicate regions unresolved in our cryo-EM structure.



# Supplementary Figure 6

## WDR24

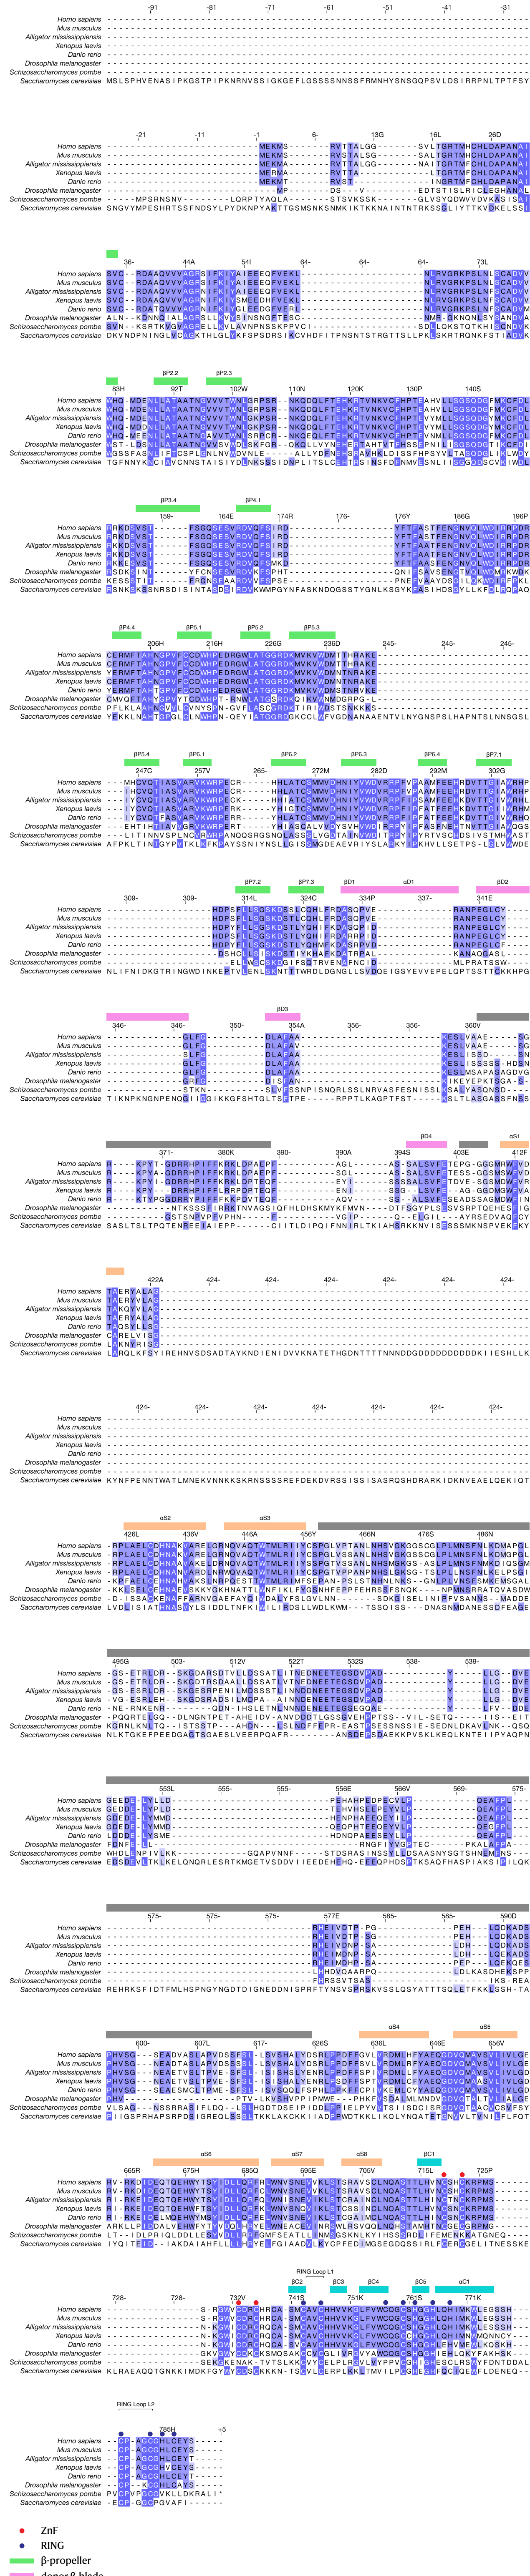

**Supplementary Fig. 6** Sequence alignment of WDR24. Secondary structure alignment of WDR24 from various organisms. Residues are colored by percentage identity. Numbering refers to the human protein sequence. Second structure boundaries are indicated above the sequence alignment and are colored by domain. Residues that participate in zinc ion coordination are labeled with either red (ZnF) or blue circles (RING). Dark gray rectangles indicate regions unresolved in our cryo-EM structure.



# Supplementary Figure 7

## WDR59

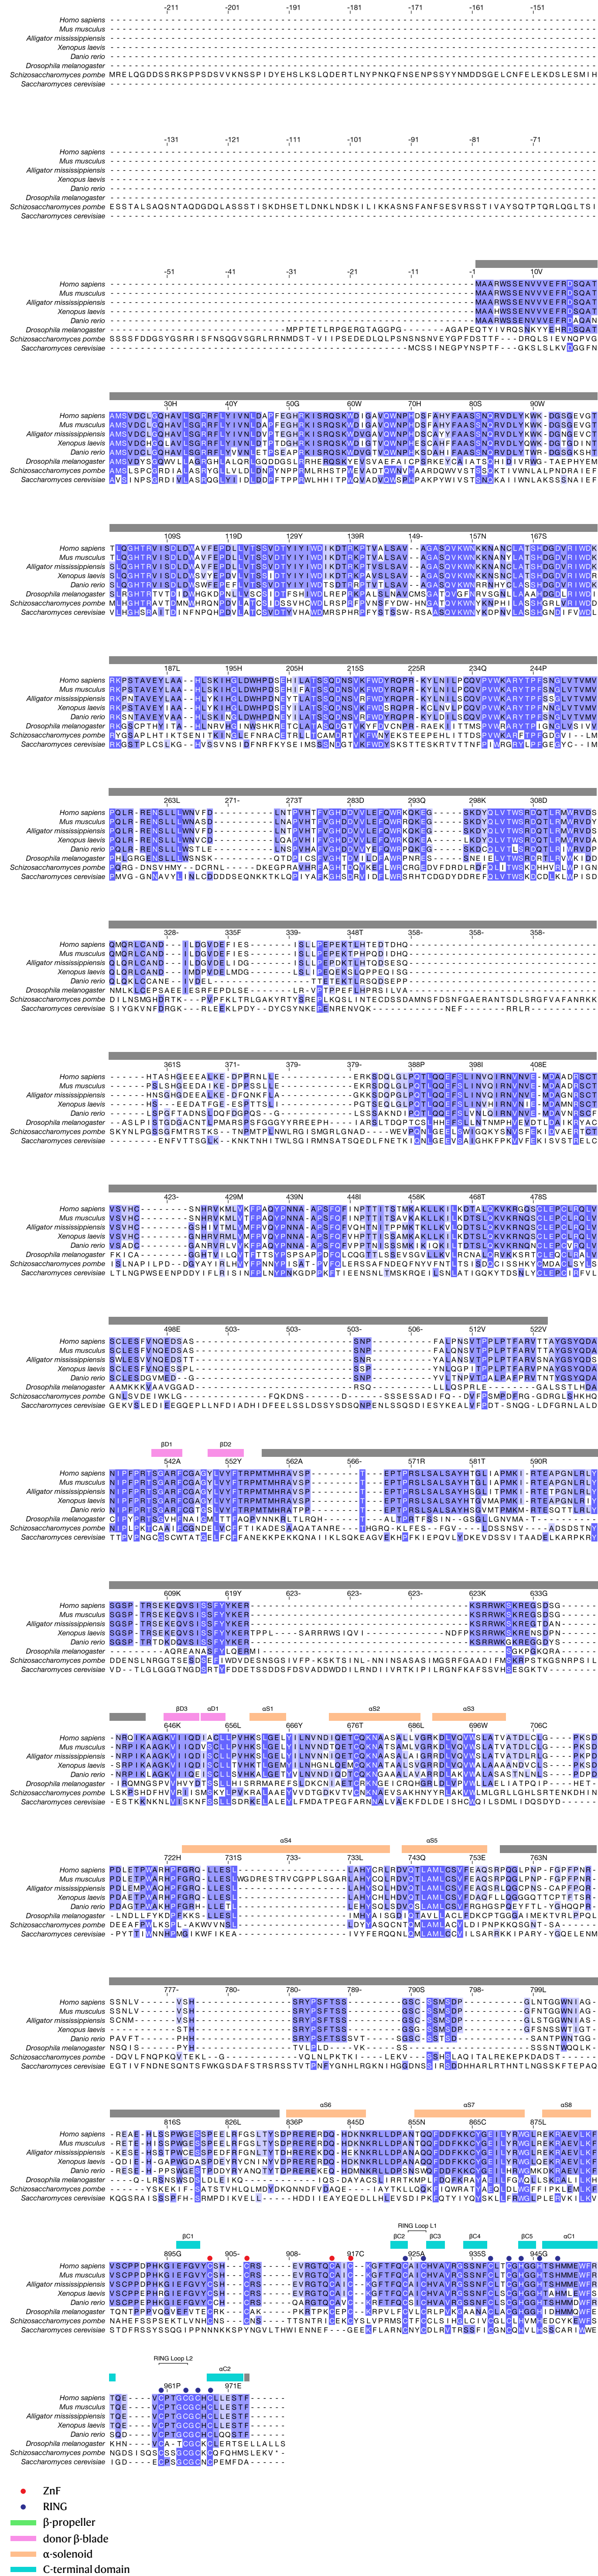

# Supplementary Figure 8

## SEH1L

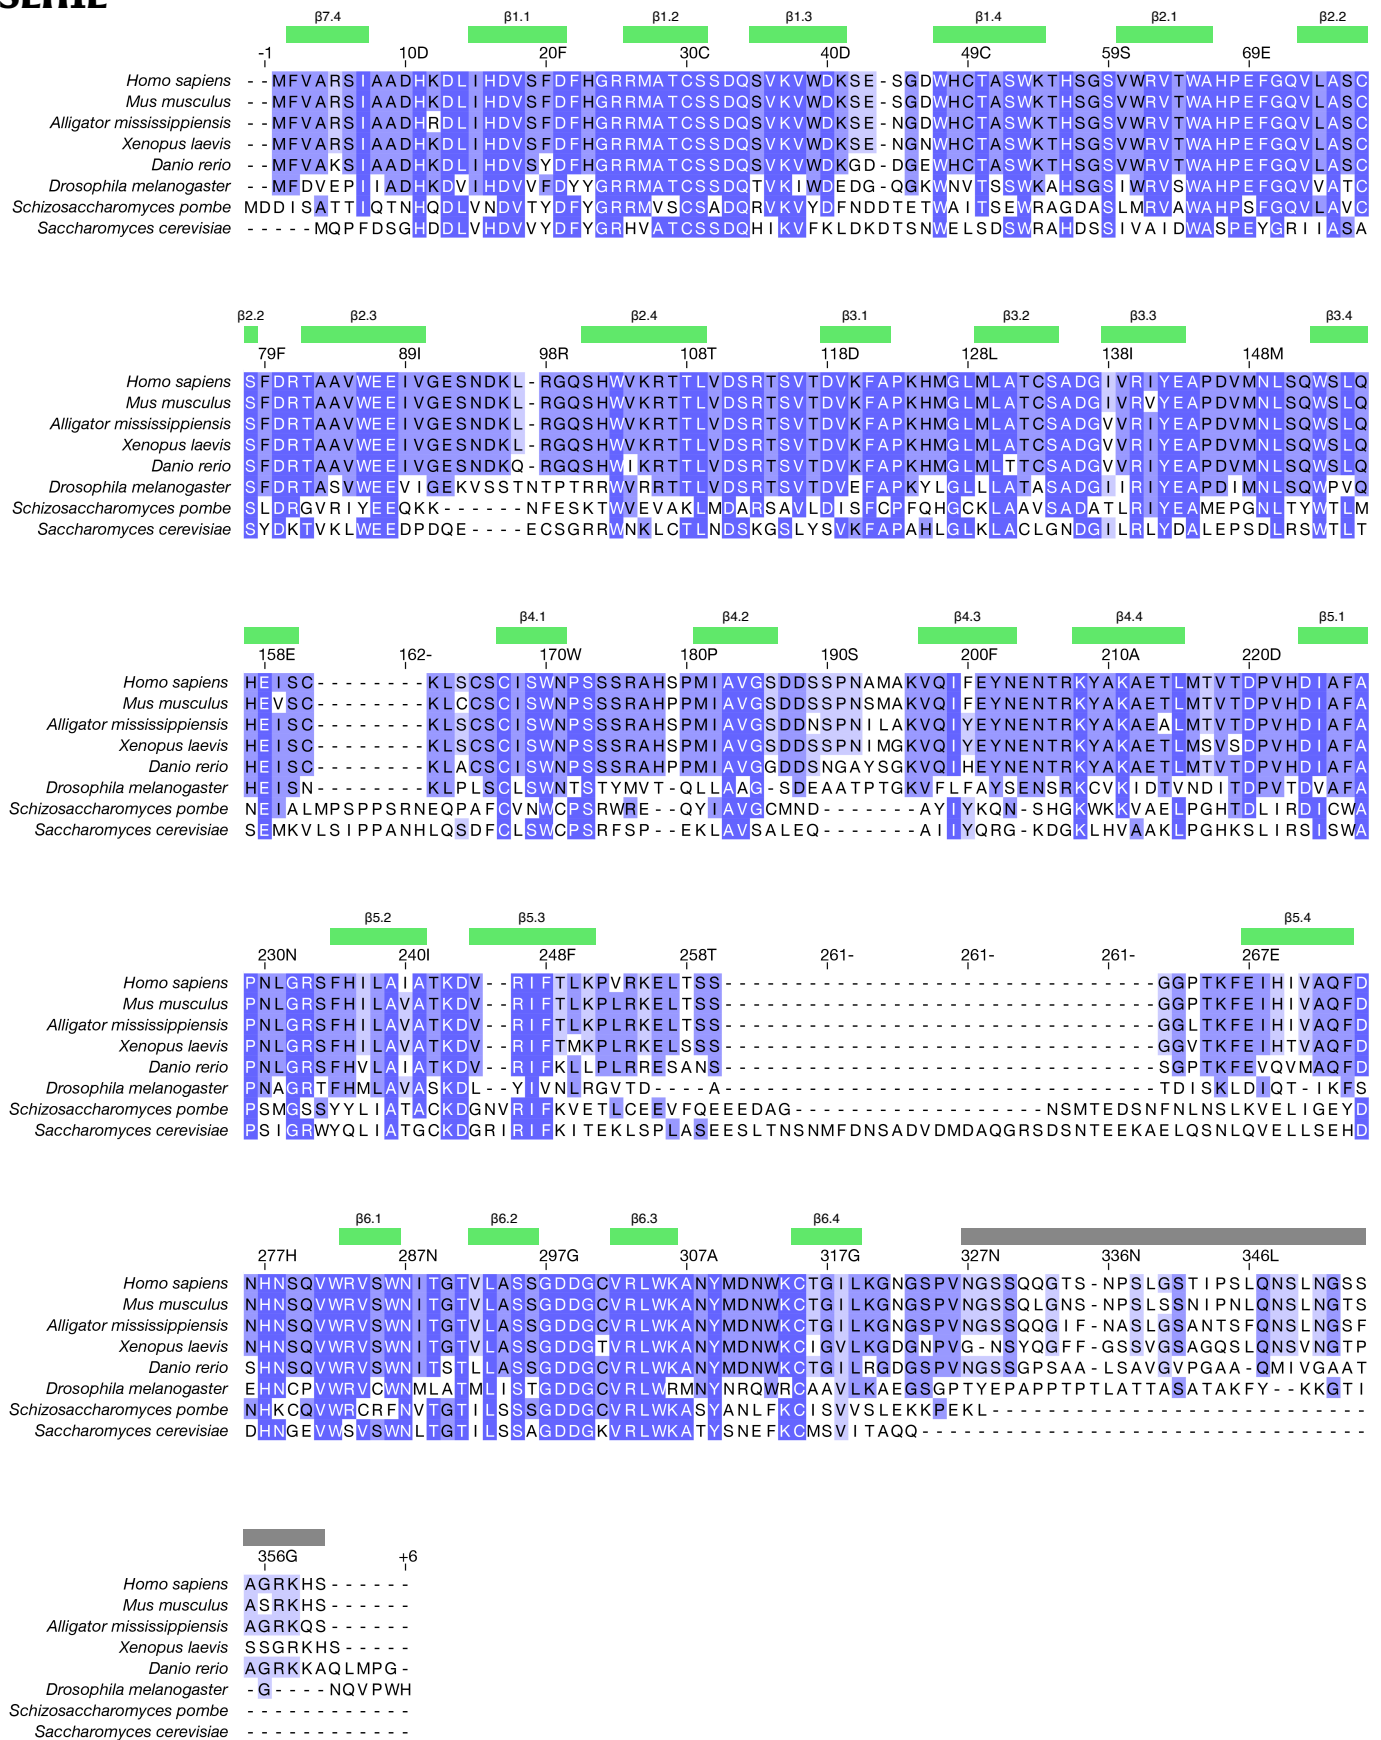

**Supplementary Fig. 8 | Sequence alignment of SEH1L.** Sequence alignment of SEH1L from various organisms. Residues are colored by percentage identity. Numbering refers to the human protein sequence. Secondary structure boundaries are indicated above the sequence alignment. Dark gray rectangles indicate regions unresolved in our cryo-EM structure.



# Supplementary Figure 9

## SEC13

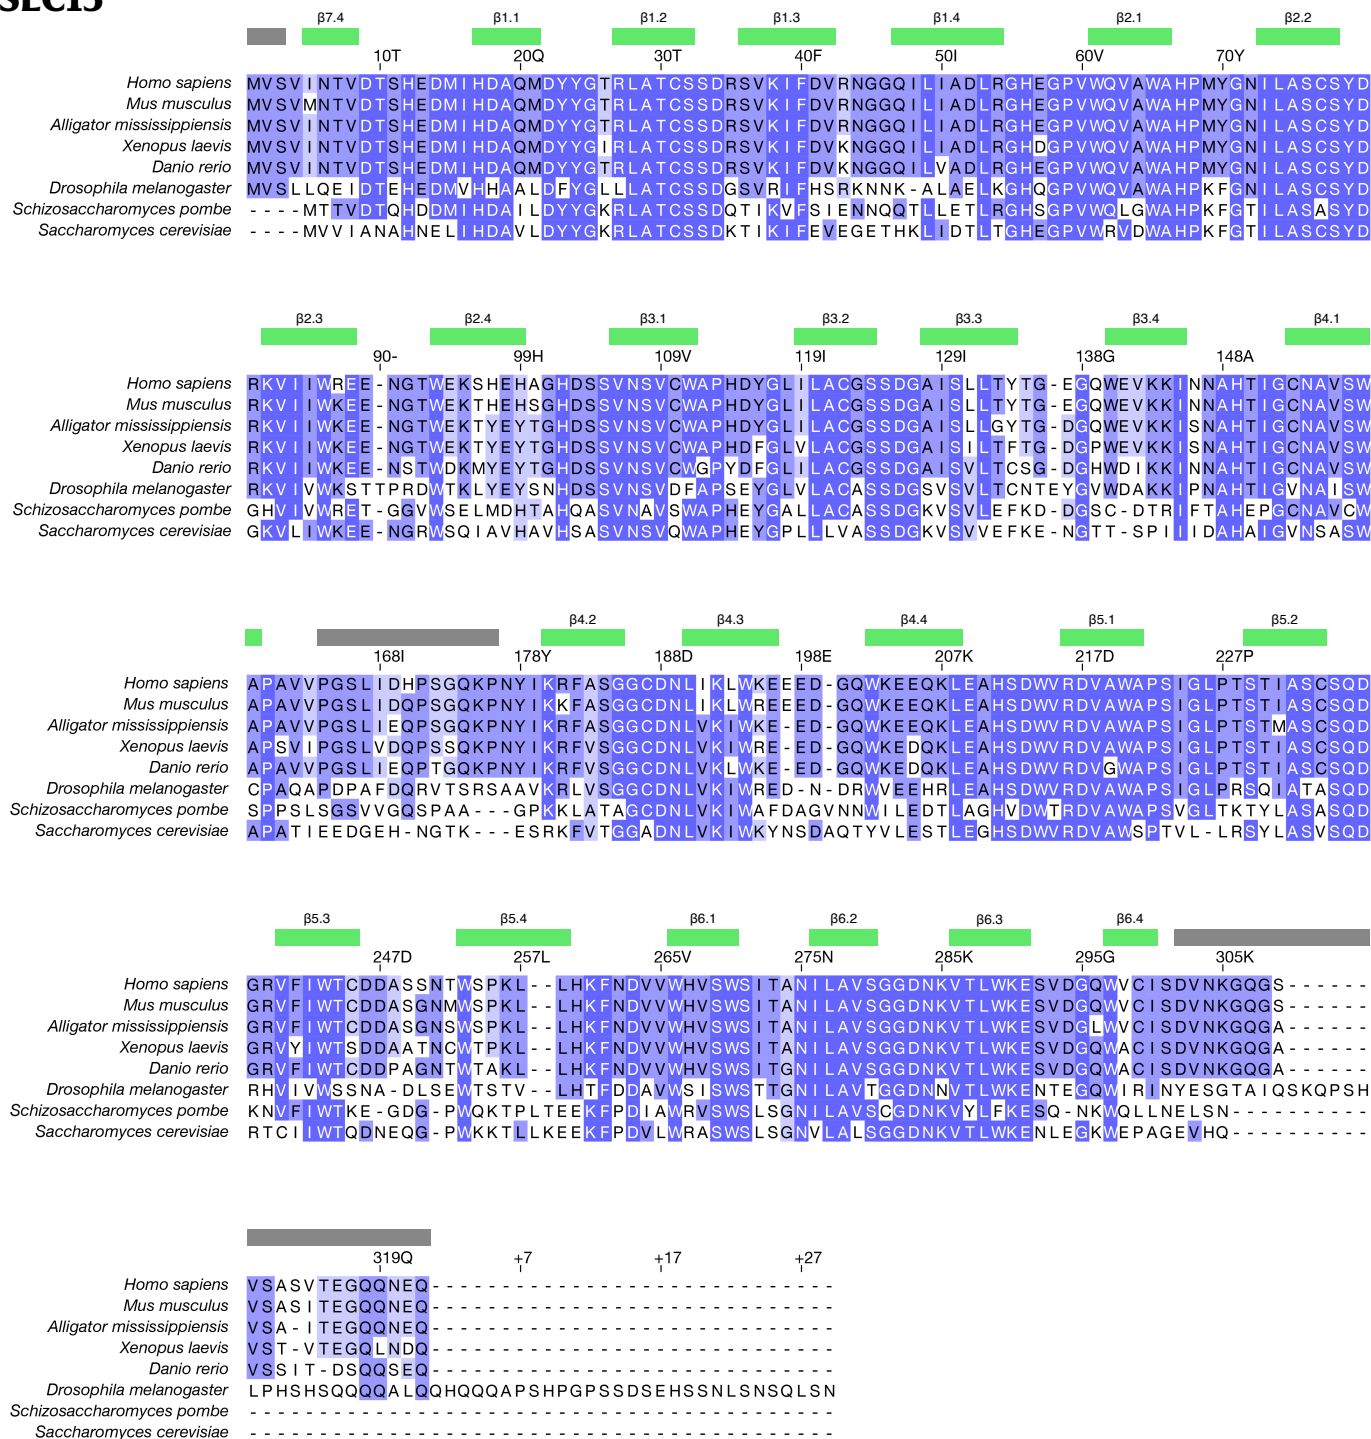

**Supplementary Fig. 9 | Sequence alignment of SEC13.** Sequence alignment of SEC13 from various organisms. Residues are colored by percentage identity. Numbering refers to the human protein sequence. Secondary structure boundaries are indicated above the sequence alignment. Dark gray rectangles indicate regions unresolved in our cryo-EM structure.

# Supplementary Table 1

## Cryo-EM data collection, refinement and validation statistics

|                                                     | GATOR2<br>global                    |                | GATOR2<br>local #1                   | GATOR2<br>local #2                   | GATOR2<br>local #3                   | GATOR2<br>local #4                   | GATOR2<br>local #5    | GATOR2<br>composite        |
|-----------------------------------------------------|-------------------------------------|----------------|--------------------------------------|--------------------------------------|--------------------------------------|--------------------------------------|-----------------------|----------------------------|
|                                                     | #1<br>UMass                         | #2<br>MIT.nano | combined<br>#1 and #2<br>C2-expanded | combined<br>#1 and #2<br>C2-expanded | combined<br>#1 and #2<br>C2-expanded | combined<br>#1 and #2<br>C2-expanded | combined<br>#1 and #2 | composite of<br>local maps |
| <b>Data collection and processing</b>               |                                     |                |                                      |                                      |                                      |                                      |                       |                            |
| Magnification (calibrated)                          | 76,415                              | 74,176         |                                      |                                      |                                      |                                      |                       |                            |
| Voltage (kV)                                        | 300                                 | 300            |                                      |                                      |                                      |                                      |                       |                            |
| Electron exposure (e <sup>-</sup> /Å <sup>2</sup> ) | 44                                  | 47             |                                      |                                      |                                      |                                      |                       |                            |
| Exposure time (s)                                   | 2.4                                 | 4.0            |                                      |                                      |                                      |                                      |                       |                            |
| Defocus range (μm)                                  | 0.8 - 2.0                           | 0.8 - 2.0      |                                      |                                      |                                      |                                      |                       |                            |
| Pixel size (Å)                                      | 0.530                               | 0.546          |                                      |                                      |                                      |                                      |                       |                            |
| Symmetry imposed                                    | C2                                  | C2             | C1                                   | C1                                   | C1                                   | C1                                   | C1                    | pseudo C2                  |
| Initial particle images (no.)                       | 913,619                             | 6,324,254      |                                      |                                      |                                      |                                      |                       |                            |
| Final particle images (no.)                         | 778,084<br><i>combined datasets</i> |                | 666,069                              | 486,346                              | 413,540                              | 191,791                              | 337,214               | -                          |
| Map resolution (Å)                                  | 3.66                                |                | 3.53                                 | 3.37                                 | 3.38                                 | 3.84                                 | 4.45                  | -                          |
| FSC threshold = 0.143                               |                                     |                |                                      |                                      |                                      |                                      |                       |                            |
| Map resolution range (Å)                            | 2.5 - 6.5                           |                |                                      |                                      |                                      |                                      |                       |                            |
| <b>Refinement</b>                                   |                                     |                |                                      |                                      |                                      |                                      |                       |                            |
| Model resolution (Å)                                |                                     |                |                                      |                                      |                                      |                                      |                       | 3.48                       |
| FSC threshold = 0.5                                 |                                     |                |                                      |                                      |                                      |                                      |                       |                            |
| Model composition                                   |                                     |                |                                      |                                      |                                      |                                      |                       |                            |
| Non-hydrogen atoms                                  |                                     |                |                                      |                                      |                                      |                                      |                       | 51810                      |
| Protein residues                                    |                                     |                |                                      |                                      |                                      |                                      |                       | 7314                       |
| Ligands                                             |                                     |                |                                      |                                      |                                      |                                      |                       | 32 (Zn <sup>2+</sup> )     |
| <i>B</i> factors (Å <sup>2</sup> )                  |                                     |                |                                      |                                      |                                      |                                      |                       |                            |
| Protein                                             |                                     |                |                                      |                                      |                                      |                                      |                       | 185.85                     |
| Ligand / ion                                        |                                     |                |                                      |                                      |                                      |                                      |                       | 159.73                     |
| R.m.s. deviations                                   |                                     |                |                                      |                                      |                                      |                                      |                       |                            |
| Bond lengths (Å)                                    |                                     |                |                                      |                                      |                                      |                                      |                       | 0.003                      |
| Bond angles (°)                                     |                                     |                |                                      |                                      |                                      |                                      |                       | 0.434                      |
| Validation                                          |                                     |                |                                      |                                      |                                      |                                      |                       | 1.21                       |
| MolProbity score                                    |                                     |                |                                      |                                      |                                      |                                      |                       | 4.34                       |
| Clashscore                                          |                                     |                |                                      |                                      |                                      |                                      |                       | 2.21                       |
| EMRinger                                            |                                     |                |                                      |                                      |                                      |                                      |                       | 0.35                       |
| Poor rotamers (%)                                   |                                     |                |                                      |                                      |                                      |                                      |                       |                            |
| Ramachandran plot                                   |                                     |                |                                      |                                      |                                      |                                      |                       | 98.12                      |
| Favored (%)                                         |                                     |                |                                      |                                      |                                      |                                      |                       | 1.88                       |
| Allowed (%)                                         |                                     |                |                                      |                                      |                                      |                                      |                       | 0.00                       |
| Disallowed (%)                                      |                                     |                |                                      |                                      |                                      |                                      |                       |                            |
| EMDB accession code                                 | 26519                               |                | 26519                                | 26519                                | 26519                                | 26519                                | 26519                 | 26519                      |
|                                                     | <i>additional</i>                   |                | <i>additional</i>                    | <i>additional</i>                    | <i>additional</i>                    | <i>additional</i>                    | <i>additional</i>     | <i>main map</i>            |
|                                                     | <i>map</i>                          |                | <i>map</i>                           | <i>map</i>                           | <i>map</i>                           | <i>map</i>                           | <i>map</i>            |                            |
| PDB accession code                                  |                                     |                |                                      |                                      |                                      |                                      |                       | 7UHY                       |

Supplementary Table 1 | Summary of cryo-EM data collection, 3D reconstruction, and model refinement.
